# Supplementary material
Source: publisher site journal article supplement (https://www.spandidos-publications.com/6157/downloadSupplementary)
Supplement: Supplementary file 1 [file downloadSupplementary]

## Sheet: mRNA+circRNA+LncRNA
Table SII. List of differentially expressed mRNAs, circRNAs and lncRNAs in TU-177 cells in which FSCN1 was knocked down vs. the controls (1.5 FC, P<0.05).
1) Differentiatlly expressed mRNA transcripts
ProbeName	P-value [(FSCN1-KD) vs. (Control)]	Regulation [(FSCN1-KD) vs. (Control)]	FC (abs) [(FSCN1-KD) vs. (Control)]	FC [(FSCN1-KD) vs. (Control)]	GeneSymbol
hsa_gmr015717	0.0207273	up	7.22095	7.22095	MUC20
hsa_bmr049843	0.000610498	up	5.49565	5.49565	SLC26A1
hsa_gmr012850	0.000449812	up	4.64716	4.64716	ZNF85
hsa_bmr040370	0.000607593	up	4.22222	4.22222	HLA-DRA
hsa_gmr102476	0.00788839	up	3.68527	3.68527	ZNF618
hsa_bmr040369	0.0124574	up	3.65883	3.65883	HLA-DRA
hsa_gmr076690	0.0032679	up	3.57451	3.57451	SLC22A7
hsa_gmr102483	0.00165259	up	3.49825	3.49825	ZNF618
hsa_gmr034211	0.000456857	up	3.41473	3.41473	DOCK2
hsa_gmr032929	0.00879343	up	3.2749	3.2749	ACOX3
hsa_gmr090780	0.0255667	up	3.25832	3.25832	PLD5
hsa_gmr078532	0.00221571	up	3.14854	3.14854	ZNF618
hsa_gmr078531	0.0429356	up	3.03062	3.03062	ZNF618
hsa_gmr118726	0.0105716	up	2.83556	2.83556	RNF165
hsa_bmr093473	0.000621739	up	2.79892	2.79892	TAL1
hsa_gmr065022	0.0322212	up	2.79424	2.79424	ZNF618
hsa_gmr044864	0.000197786	up	2.78554	2.78554	ZNF618
hsa_gmr004865	0.00133408	up	2.77586	2.77586	CCHCR1
hsa_bmr074848	0.0171402	up	2.75755	2.75755	GREB1
hsa_gmr016946	0.000561105	up	2.70229	2.70229	CDK14
hsa_gmr083978	0.000132542	up	2.68229	2.68229	MEI1
hsa_gmr001133	0.0314516	up	2.66947	2.66947	INPP5J
hsa_gmr016956	0.0269845	up	2.64005	2.64005	HNF4A
hsa_gmr048851	0.0489905	up	2.62402	2.62402	VSTM1
hsa_gmr082458	0.00301612	up	2.58635	2.58635	ZNF836
hsa_gmr045137	0.00224589	up	2.5828	2.5828	FOXP4
hsa_gmr087308	0.0150506	up	2.55805	2.55805	SIPA1L1
hsa_gmr043045	0.00648352	up	2.5527	2.5527	ROPN1L
hsa_gmr120131	0.0154331	up	2.54587	2.54587	MAP2
hsa_gmr041475	0.0477317	up	2.54539	2.54539	GPSM3
hsa_gmr065440	0.00124995	up	2.5421	2.5421	DHX37
hsa_gmr018900	0.000252187	up	2.54153	2.54153	ABLIM3
hsa_gmr048493	0.00630746	up	2.52567	2.52567	CYP2U1
hsa_gmr025433	0.0416165	up	2.52229	2.52229	ATG13
hsa_gmr000412	0.00356309	up	2.51717	2.51717	HNF4A
hsa_gmr025222	0.0214595	up	2.50784	2.50784	ABLIM3
hsa_gmr016944	0.00203875	up	2.49831	2.49831	CDK14
hsa_gmr113958	0.00040534	up	2.46847	2.46847	ABLIM3
hsa_gmr104312	0.00177998	up	2.46777	2.46777	ACBD5
hsa_gmr097366	0.018808	up	2.46479	2.46479	CADPS
hsa_bmr046093	0.00758746	up	2.45002	2.45002	ZNF585B
hsa_gmr066855	0.0394453	up	2.44629	2.44629	RIN2
hsa_gmi132404	0.00303621	up	2.43957	2.43957	FOXK2
hsa_gmr088802	0.0129779	up	2.42698	2.42698	PLAU
hsa_gmr101151	0.00147409	up	2.42569	2.42569	CDK14
hsa_gmr087350	0.0463012	up	2.4244	2.4244	SERPINA9
hsa_bmr040367	0.0125224	up	2.42413	2.42413	HLA-DRA
hsa_bmr040366	0.0106736	up	2.41986	2.41986	HLA-DRA
hsa_gmr078533	0.006087	up	2.41201	2.41201	ZNF618
hsa_bmr040373	0.0301584	up	2.40824	2.40824	HLA-DRA
hsa_gmr002167	0.00501197	up	2.40509	2.40509	FOXP4
hsa_gmr073180	0.0313506	up	2.39808	2.39808	GFOD2
hsa_bmr087692	0.0249305	up	2.38369	2.38369	LOC105378189
hsa_gmr025455	0.00784386	up	2.37899	2.37899	ATG13
hsa_gmr064163	0.000819775	up	2.37653	2.37653	ACOX3
hsa_gmr067211	0.0192246	up	2.37514	2.37514	CYP2U1
hsa_gmr024210	0.000406317	up	2.37487	2.37487	GANAB
hsa_gmr031855	0.0165936	up	2.35481	2.35481	LMO1
hsa_gmr064753	0.00287166	up	2.35423	2.35423	CDK14
hsa_gmr078182	0.0181006	up	2.35356	2.35356	ZNF16
hsa_gmr016945	0.0183748	up	2.34473	2.34473	CDK14
hsa_bmr029917	0.00161611	up	2.3172	2.3172	MOK
hsa_gmr024208	0.000154937	up	2.29786	2.29786	GANAB
hsa_gmr014710	4.58344e-05	up	2.29454	2.29454	GANAB
hsa_gmi123205	0.0442802	up	2.29422	2.29422	GREB1
hsa_gmi130103	0.0204474	up	2.28428	2.28428	DHX37
hsa_gmr064162	0.025686	up	2.28376	2.28376	ACOX3
hsa_gmr104715	0.000210272	up	2.28341	2.28341	GANAB
hsa_gmr113660	0.0232965	up	2.28311	2.28311	ZNF41
hsa_gmr066129	0.000793304	up	2.28147	2.28147	RNF157
hsa_gmr020736	0.0243448	up	2.27854	2.27854	ZNF618
hsa_gmr048253	0.00545354	up	2.26909	2.26909	C1orf210
hsa_gmr118875	0.019416	up	2.26861	2.26861	CCDC159
hsa_gmr107138	0.00598779	up	2.26289	2.26289	IFT88
hsa_gmr024211	0.000375097	up	2.26003	2.26003	GANAB
hsa_bmr038840	0.00014316	up	2.25357	2.25357	KLF2
hsa_gmr020372	0.00479178	up	2.25006	2.25006	PLAC1
hsa_gmr008915	0.0188887	up	2.24724	2.24724	MBNL3
hsa_bmr075210	0.0276481	up	2.24714	2.24714	KIAA1211L
hsa_gmr002166	0.00133539	up	2.24547	2.24547	FOXP4
hsa_gmr094839	0.00396848	up	2.23576	2.23576	LRRTM1
hsa_gmr077659	0.0165214	up	2.2356	2.2356	MOGAT3
hsa_gmr073630	0.0117077	up	2.23477	2.23477	CARD8
hsa_gmr027032	0.0104569	up	2.23408	2.23408	RASGRP3
hsa_gmr048772	0.000334248	up	2.22923	2.22923	GANAB
hsa_gmr113214	0.0146205	up	2.22821	2.22821	PNMA5
hsa_gmr111062	0.00568395	up	2.22597	2.22597	CEACAM4
hsa_gmr043496	0.0054122	up	2.21257	2.21257	DHX37
hsa_gmr004768	0.00160088	up	2.20804	2.20804	ZNF836
hsa_gmr033800	0.0046195	up	2.20573	2.20573	FOXK2
hsa_gmr069598	0.0306981	up	2.2047	2.2047	TRAF3IP3
hsa_gmr066854	0.00619355	up	2.2038	2.2038	RIN2
hsa_gmr029325	0.0452387	up	2.19689	2.19689	NEK11
hsa_gmr013686	0.020014	up	2.19666	2.19666	MS4A14
hsa_gmi057826	0.0149371	up	2.1865	2.1865	POLR2F
hsa_gmr107455	0.000462577	up	2.18563	2.18563	SIPA1L1
hsa_gmr086312	0.00111561	up	2.18193	2.18193	PRR7
hsa_gmr026374	0.0441986	up	2.17813	2.17813	DARS
hsa_gmr037882	0.00439277	up	2.17473	2.17473	ABLIM3
hsa_gmi131462	0.0251577	up	2.17458	2.17458	ZSCAN29
hsa_gmr024209	7.52859e-05	up	2.16947	2.16947	GANAB
hsa_gmr118391	0.0248887	up	2.165	2.165	ADAP2
hsa_gmr083003	0.00898365	up	2.16404	2.16404	CASP14
hsa_gmr035799	0.00110535	up	2.15884	2.15884	MMP24
hsa_gmr117238	0.0285707	up	2.15856	2.15856	SIPA1L1
hsa_gmr077086	0.00776632	up	2.15707	2.15707	TRIM15
hsa_gmr073526	0.000973749	up	2.15383	2.15383	CCDC159
hsa_gmr004614	0.0107202	up	2.14818	2.14818	PHACTR2
hsa_gmi054742	0.00835585	up	2.14696	2.14696	IL11RA
hsa_gmr083636	0.0261831	up	2.14612	2.14612	RIN2
hsa_gmr113956	0.00218401	up	2.13915	2.13915	ABLIM3
hsa_gmr064755	0.0154418	up	2.12664	2.12664	CDK14
hsa_gmr025224	0.000132981	up	2.12658	2.12658	ABLIM3
hsa_gmr064754	0.000715601	up	2.12003	2.12003	CDK14
hsa_gmr017361	0.0243448	up	2.11627	2.11627	VSTM1
hsa_gmr014709	0.000166623	up	2.11501	2.11501	GANAB
hsa_gmr018884	0.00424764	up	2.11149	2.11149	ABLIM3
hsa_gmr043921	0.00846833	up	2.11013	2.11013	CASP7
hsa_gmr031370	0.000356508	up	2.1048	2.1048	CRYAB
hsa_gmi139385	0.00589128	up	2.10454	2.10454	MOK
hsa_gmr013771	0.00131263	up	2.09862	2.09862	CASP7
hsa_gmr004712	0.0270479	up	2.09232	2.09232	ACOX3
hsa_bmr092570	0.00823371	up	2.08644	2.08644	DNM3
hsa_gmi127028	0.0344857	up	2.08617	2.08617	PDE1C
hsa_gmr112233	0.0485758	up	2.08378	2.08378	RIN2
hsa_gmr082459	0.00177043	up	2.08263	2.08263	ZNF836
hsa_gmr118304	0.0135748	up	2.08085	2.08085	FOXK2
hsa_bmr076769	0.0267134	up	2.07423	2.07423	ZBTB12
hsa_gmr030013	0.0305173	up	2.07268	2.07268	KDM4C
hsa_gmr073730	0.0360135	up	2.07211	2.07211	RIN2
hsa_gmr041415	0.00900979	up	2.0684	2.0684	ZNF711
hsa_gmr011750	7.82894e-05	up	2.06513	2.06513	CASP7
hsa_gmi133613	0.0399302	up	2.06421	2.06421	TASP1
hsa_gmr087307	0.000582237	up	2.06161	2.06161	SIPA1L1
hsa_bmr044581	0.00411742	up	2.05297	2.05297	TRIM34
hsa_bmr047681	0.0164894	up	2.05196	2.05196	STX12
hsa_bmr030873	0.0378031	up	2.044	2.044	KLF18
hsa_gmr070679	0.000405726	up	2.04322	2.04322	NPHP1
hsa_gmr048625	0.0195803	up	2.03579	2.03579	CLEC7A
hsa_gmr043920	0.0203801	up	2.03542	2.03542	CASP7
hsa_gmr025223	0.0209243	up	2.03441	2.03441	ABLIM3
hsa_gmr019651	0.0485936	up	2.0333	2.0333	HECW2
hsa_gmr078140	0.0477855	up	2.02903	2.02903	ZNF250
hsa_bmr047647	0.00465104	up	2.02834	2.02834	TAS2R39
hsa_gmr097098	0.0204494	up	2.0264	2.0264	ROBO2
hsa_gmr016243	0.00170126	up	2.02488	2.02488	INPP5J
hsa_gmr113957	0.00464919	up	2.02407	2.02407	ABLIM3
hsa_gmr029687	0.0110017	up	2.02285	2.02285	IFT88
hsa_gmr099355	0.0157212	up	2.01769	2.01769	ROPN1L
hsa_gmr017762	0.0429743	up	2.01189	2.01189	SLC1A3
hsa_gmr010394	0.00063538	up	2.00985	2.00985	HSDL2
hsa_bmr040372	0.0147121	up	2.00922	2.00922	HLA-DRA
hsa_gmr120605	0.00169868	up	2.00164	2.00164	TTC21A
hsa_gmr025221	0.0246936	up	1.99633	1.99633	ABLIM3
hsa_gmr076335	0.0416414	up	1.99512	1.99512	ACOX3
hsa_gmr083638	0.0298241	up	1.9947	1.9947	RIN2
hsa_gmr108008	0.00680714	up	1.99112	1.99112	ZSCAN29
hsa_gmr104329	0.0145805	up	1.98947	1.98947	FANK1
hsa_gmr072453	0.0396485	up	1.98946	1.98946	LPXN
hsa_gmr004884	0.00818184	up	1.98894	1.98894	SYCE2
hsa_gmr011872	0.000783177	up	1.98874	1.98874	RIN2
hsa_gmr111195	0.000391991	up	1.98613	1.98613	ZNF836
hsa_gmr094943	0.0331638	up	1.98471	1.98471	MAP2
hsa_gmr044572	0.00294949	up	1.98455	1.98455	DCBLD2
hsa_gmr043853	0.0233903	up	1.98162	1.98162	TRIM15
hsa_gmr081600	0.03476	up	1.98157	1.98157	ITGA2B
hsa_gmr084394	0.0160477	up	1.97464	1.97464	MAGED1
hsa_gmr106018	0.00104983	up	1.97335	1.97335	CLEC12B
hsa_gmr006615	0.028359	up	1.97091	1.97091	CRISP2
hsa_gmr081706	0.00239151	up	1.96783	1.96783	CCDC40
hsa_gmi136246	0.0257948	up	1.96654	1.96654	PUS7L
hsa_bmr044663	0.0243669	up	1.96334	1.96334	DNAAF4
hsa_gmr103133	0.000283539	up	1.96333	1.96333	HSDL2
hsa_gmr083267	0.000442723	up	1.95845	1.95845	RGS19
hsa_gmr102475	0.000800173	up	1.95648	1.95648	ZNF618
hsa_gmr083269	0.000691373	up	1.95052	1.95052	RGS19
hsa_gmi139902	0.00606905	up	1.94999	1.94999	STK11IP
hsa_bmi143410	0.00700229	up	1.94723	1.94723	CIITA
hsa_gmr080244	0.00382097	up	1.94634	1.94634	LRRC49
hsa_gmi055736	0.0080878	up	1.94091	1.94091	ZFAND4
hsa_gmi124975	0.0244854	up	1.9394	1.9394	WDR19
hsa_gmi058356	0.0403813	up	1.93725	1.93725	CEP112
hsa_gmr081499	0.0122712	up	1.93605	1.93605	CEP112
hsa_gmr027692	0.0114306	up	1.93526	1.93526	FTCDNL1
hsa_gmr085390	0.00777601	up	1.92998	1.92998	RASGRP3
hsa_gmr013544	0.0353006	up	1.9293	1.9293	ARHGAP20
hsa_gmr103132	0.000137301	up	1.92902	1.92902	HSDL2
hsa_gmr075809	0.00280886	up	1.92745	1.92745	DCBLD2
hsa_gmr089354	0.0168102	up	1.92481	1.92481	TTC39A
hsa_gmr089181	0.00117393	up	1.92441	1.92441	OSCP1
hsa_gmr087704	0.0153301	up	1.9222	1.9222	MCF2L
hsa_gmr018887	0.00979403	up	1.92135	1.92135	ABLIM3
hsa_gmr066682	0.00637902	up	1.91948	1.91948	SYCE2
hsa_gmr111696	0.000942858	up	1.91821	1.91821	TPM4
hsa_gmr083637	0.00187861	up	1.91688	1.91688	RIN2
hsa_gmr073731	0.0196495	up	1.91549	1.91549	RIN2
hsa_gmr071941	0.0371838	up	1.91512	1.91512	PTPRD
hsa_gmr034017	0.00148469	up	1.91353	1.91353	ZW10
hsa_gmr119141	0.000559128	up	1.91057	1.91057	TPM4
hsa_gmr029916	0.000598023	up	1.90908	1.90908	MOK
hsa_gmr004615	0.00197528	up	1.90812	1.90812	PHACTR2
hsa_gmr032733	0.000727804	up	1.90749	1.90749	TPM4
hsa_gmr104222	0.000377852	up	1.90437	1.90437	CASP7
hsa_gmr111697	0.00121967	up	1.90315	1.90315	TPM4
hsa_gmr105466	0.00391801	up	1.89868	1.89868	ZW10
hsa_gmr088522	0.0418492	up	1.89759	1.89759	MORN4
hsa_bmr036529	0.00450666	up	1.89482	1.89482	CASP14
hsa_gmr044131	0.000104112	up	1.89377	1.89377	RNF157
hsa_gmr013773	0.00206243	up	1.89108	1.89108	CASP7
hsa_bmr031384	0.00180558	up	1.89094	1.89094	CTGF
hsa_gmr021382	0.0115067	up	1.88926	1.88926	PLAU
hsa_gmi132535	0.0172092	up	1.8891	1.8891	ZNF594
hsa_gmr077316	0.0167673	up	1.88858	1.88858	ITGB8
hsa_gmr024858	0.0132978	up	1.88594	1.88594	OSCP1
hsa_gmi143644	0.000560188	up	1.88495	1.88495	FOXK2
hsa_gmr117233	0.0384599	up	1.88192	1.88192	SIPA1L1
hsa_gmr066725	0.000535607	up	1.88167	1.88167	RGS19
hsa_gmi058466	0.000326433	up	1.8814	1.8814	FOPNL
hsa_gmr028121	0.0113063	up	1.88107	1.88107	IRAK4
hsa_gmr065874	0.0139651	up	1.87663	1.87663	RPGRIP1L
hsa_gmr108822	0.0190072	up	1.8754	1.8754	RPGRIP1L
hsa_gmr037672	0.00373811	up	1.87525	1.87525	PHACTR2
hsa_gmr067745	0.0328131	up	1.87257	1.87257	TTC21A
hsa_gmr071948	0.00135172	up	1.87093	1.87093	RFX3
hsa_gmr076124	0.00410402	up	1.87004	1.87004	CCDC191
hsa_gmr027536	0.0150061	up	1.87001	1.87001	CEP57L1
hsa_gmr083167	0.00151979	up	1.86769	1.86769	TPM4
hsa_gmi131081	0.0334735	up	1.86657	1.86657	MOK
hsa_gmr049668	0.00330539	up	1.86598	1.86598	NPHP1
hsa_gmr085452	0.00339048	up	1.86587	1.86587	VIT
hsa_gmr036017	0.0211558	up	1.86583	1.86583	IFT27
hsa_gmr027033	0.0029252	up	1.8612	1.8612	RASGRP3
hsa_gmi128847	0.00149601	up	1.86034	1.86034	ZDHHC16
hsa_gmr036175	5.23233e-05	up	1.85979	1.85979	CNTRL
hsa_gmi058465	0.00171427	up	1.85838	1.85838	FOPNL
hsa_bmr044610	0.000894573	up	1.85754	1.85754	CHST14
hsa_gmr066460	0.0166826	up	1.85611	1.85611	ERCC1
hsa_gmr025080	0.00272139	up	1.85568	1.85568	CNTRL
hsa_gmr009493	0.000327435	up	1.85505	1.85505	IFT27
hsa_gmr102758	0.0022501	up	1.85421	1.85421	TNC
hsa_gmr103199	0.0235807	up	1.85187	1.85187	MVB12B
hsa_gmr029919	0.0229862	up	1.84979	1.84979	MOK
hsa_gmr117146	0.021805	up	1.84965	1.84965	STARD13
hsa_gmr083166	0.00136768	up	1.84906	1.84906	TPM4
hsa_gmr088173	0.0308438	up	1.84843	1.84843	PPHLN1
hsa_gmr019830	0.00385488	up	1.84829	1.84829	SETD7
hsa_gmr048652	2.26078e-05	up	1.84721	1.84721	ZDHHC16
hsa_gmr103134	0.000294184	up	1.84714	1.84714	HSDL2
hsa_gmr003045	0.0178609	up	1.8464	1.8464	CEP112
hsa_gmr112234	0.0289028	up	1.84491	1.84491	RIN2
hsa_gmr106145	0.0143717	up	1.84196	1.84196	PPHLN1
hsa_gmr113826	0.0359767	up	1.8393	1.8393	HEPH
hsa_gmr029333	0.037495	up	1.83764	1.83764	NEK11
hsa_gmr116015	0.0001405	up	1.83589	1.83589	ZDHHC16
hsa_gmr072794	0.0401928	up	1.8357	1.8357	IFT88
hsa_gmr101827	0.00396928	up	1.83489	1.83489	PSD3
hsa_bmr045820	0.045462	up	1.83448	1.83448	C7orf33
hsa_gmr027037	0.0054996	up	1.83399	1.83399	RASGRP3
hsa_gmi052820	0.000680296	up	1.83221	1.83221	HSDL2
hsa_gmr097863	0.0440079	up	1.82888	1.82888	FAM200B
hsa_gmr065623	0.00589991	up	1.82872	1.82872	LRRC49
hsa_gmr111096	0.0457665	up	1.82789	1.82789	CCDC159
hsa_gmr083268	0.0035031	up	1.82771	1.82771	RGS19
hsa_gmr002912	0.0213846	up	1.82672	1.82672	PBLD
hsa_gmr078521	0.00312347	up	1.82665	1.82665	CNTRL
hsa_gmr111099	0.00240473	up	1.8245	1.8245	CCDC159
hsa_gmr007699	0.00506766	up	1.82274	1.82274	ANXA4
hsa_gmr078408	0.0116465	up	1.82164	1.82164	KIF24
hsa_gmr101828	0.0175853	up	1.82102	1.82102	PSD3
hsa_gmr117237	0.00255625	up	1.81991	1.81991	SIPA1L1
hsa_gmr066165	0.0145514	up	1.81988	1.81988	CEP112
hsa_gmi062349	0.016485	up	1.81736	1.81736	CARF
hsa_gmr089015	0.00629205	up	1.8167	1.8167	FANK1
hsa_gmr077558	0.0140333	up	1.81547	1.81547	CDHR3
hsa_gmr105465	0.00145481	up	1.81466	1.81466	ZW10
hsa_gmr067446	0.0176663	up	1.8143	1.8143	NPHP1
hsa_gmr111175	0.0114969	up	1.81247	1.81247	ZNF583
hsa_gmr067742	0.0109383	up	1.81214	1.81214	TTC21A
hsa_gmr063703	0.0406126	up	1.81178	1.81178	FN1
hsa_gmr043255	0.000121496	up	1.81126	1.81126	HSDL2
hsa_bmr047702	0.0151287	up	1.81084	1.81084	SULT1A1
hsa_bmr044125	0.00264315	up	1.80757	1.80757	ELFN2
hsa_gmr116016	0.000423377	up	1.80571	1.80571	ZDHHC16
hsa_gmr007201	0.000344444	up	1.80501	1.80501	TPM4
hsa_gmr116405	0.0305104	up	1.80495	1.80495	PKNOX2
hsa_gmr019552	0.000203814	up	1.80401	1.80401	FOPNL
hsa_gmr071946	0.0350961	up	1.80273	1.80273	RFX3
hsa_gmr021812	0.00485208	up	1.80225	1.80225	ANXA4
hsa_gmi062964	0.049196	up	1.80151	1.80151	TERT
hsa_gmr034854	0.0469349	up	1.80122	1.80122	ZNF354A
hsa_gmr014406	0.0156009	up	1.80119	1.80119	MOK
hsa_gmr067210	0.00047645	up	1.80106	1.80106	CYP2U1
hsa_gmr088174	0.0298123	up	1.79786	1.79786	PPHLN1
hsa_gmr107709	0.00654792	up	1.79687	1.79687	MOK
hsa_gmr045681	0.0249755	up	1.79448	1.79448	AK9
hsa_gmr072280	0.00086115	up	1.79279	1.79279	ZDHHC16
hsa_gmr035049	0.00106017	up	1.7924	1.7924	RGS19
hsa_gmr112231	0.00238792	up	1.79144	1.79144	RIN2
hsa_gmr065020	0.00120339	up	1.79059	1.79059	CNTRL
hsa_gmr020959	0.00798958	up	1.7899	1.7899	IFT88
hsa_gmr021811	0.00232944	up	1.78892	1.78892	ANXA4
hsa_gmr072898	0.000591867	up	1.78816	1.78816	MOK
hsa_gmi056218	0.00041036	up	1.78665	1.78665	ZDHHC16
hsa_gmr120573	0.00134686	up	1.78615	1.78615	DCBLD2
hsa_gmr019546	0.000804673	up	1.7848	1.7848	FOPNL
hsa_gmr113806	0.0221407	up	1.78474	1.78474	MAGED1
hsa_gmr014556	0.0255577	up	1.78407	1.78407	C11orf74
hsa_gmr078526	0.0038894	up	1.78377	1.78377	CNTRL
hsa_gmr015283	0.0447749	up	1.78355	1.78355	FASTKD1
hsa_gmr115447	0.0480257	up	1.78338	1.78338	RFX3
hsa_gmr029962	0.0117333	up	1.78303	1.78303	ARHGEF9
hsa_gmr010127	0.000578682	up	1.78101	1.78101	MSRB3
hsa_bmr083276	0.00446945	up	1.78091	1.78091	MMP24
hsa_gmr101922	0.00394685	up	1.77976	1.77976	HNF4G
hsa_gmr119338	0.0133255	up	1.7795	1.7795	RIN2
hsa_gmr042718	0.0251827	up	1.77906	1.77906	SYNC
hsa_gmr016297	0.0180057	up	1.77839	1.77839	LRRC49
hsa_gmr065118	0.00170476	up	1.77568	1.77568	TNC
hsa_gmr067106	0.00956595	up	1.77526	1.77526	ARHGEF9
hsa_gmr086944	0.0493087	up	1.7745	1.7745	NHSL1
hsa_gmr017181	0.000475322	up	1.77414	1.77414	ZDHHC16
hsa_gmr036145	0.00372814	up	1.77312	1.77312	MAGED1
hsa_bmr091938	0.00134885	up	1.77225	1.77225	DUSP10
hsa_gmr116357	0.0198547	up	1.77212	1.77212	TTC12
hsa_gmr069425	0.0442293	up	1.77199	1.77199	AK8
hsa_gmr089857	0.024551	up	1.7709	1.7709	MORN1
hsa_gmr076714	0.00220905	up	1.76985	1.76985	FOXP4
hsa_gmr107367	0.0107483	up	1.76964	1.76964	MDGA2
hsa_gmr118008	0.013203	up	1.76905	1.76905	ACSM3
hsa_gmr120572	0.00089567	up	1.76876	1.76876	DCBLD2
hsa_gmr019794	0.00294747	up	1.76826	1.76826	FN1
hsa_gmr072283	0.000224134	up	1.76786	1.76786	ZDHHC16
hsa_gmr015413	0.0125555	up	1.76673	1.76673	RFX3
hsa_gmr028847	0.0393897	up	1.76638	1.76638	ZNF133
hsa_gmr072278	2.75381e-05	up	1.76511	1.76511	ZDHHC16
hsa_gmr079630	0.0109007	up	1.76492	1.76492	TRIM66
hsa_gmr018676	0.0224974	up	1.76438	1.76438	ANGEL2
hsa_gmr119337	0.000237393	up	1.76378	1.76378	RIN2
hsa_gmr015715	0.0105957	up	1.76366	1.76366	ZNF343
hsa_gmr029688	0.0397598	up	1.76306	1.76306	IFT88
hsa_gmr120960	0.0265934	up	1.76305	1.76305	NEK11
hsa_gmr107712	0.000119805	up	1.76257	1.76257	MOK
hsa_gmr003147	0.000902047	up	1.76147	1.76147	RGS19
hsa_gmr080243	0.00224047	up	1.76109	1.76109	LRRC49
hsa_gmr108540	0.0134323	up	1.75979	1.75979	MEGF11
hsa_gmr107186	0.0166992	up	1.75968	1.75968	STARD13
hsa_gmr008111	0.0285242	up	1.75888	1.75888	CPA4
hsa_gmr082564	0.0428651	up	1.75873	1.75873	MAMSTR
hsa_gmr002776	0.000133997	up	1.7579	1.7579	MSRB3
hsa_gmr115713	0.0417055	up	1.75641	1.75641	RRP12
hsa_bmr088974	0.00880229	up	1.75616	1.75616	PCGF5
hsa_bmr109601	0.0292594	up	1.75567	1.75567	MGAT5B
hsa_gmr035535	0.000713283	up	1.75552	1.75552	PRDX4
hsa_gmr117925	0.000592791	up	1.75278	1.75278	CIITA
hsa_gmr099840	0.00217478	up	1.7526	1.7526	DOPEY1
hsa_gmr064505	0.031059	up	1.75238	1.75238	CRISP2
hsa_gmr067094	0.0388868	up	1.75198	1.75198	ZMAT1
hsa_gmr010126	9.69576e-05	up	1.75163	1.75163	MSRB3
hsa_gmr004613	0.0125148	up	1.75052	1.75052	PHACTR2
hsa_gmr116651	0.000396733	up	1.75035	1.75035	MSRB3
hsa_gmr078524	0.000576011	up	1.74929	1.74929	CNTRL
hsa_gmr076937	0.0299284	up	1.7488	1.7488	TREM1
hsa_gmr116033	0.0172266	up	1.74724	1.74724	FANK1
hsa_gmr102463	0.00417571	up	1.74694	1.74694	CNTRL
hsa_gmr066724	0.00280771	up	1.74626	1.74626	RGS19
hsa_gmr104328	0.0211809	up	1.7441	1.7441	FANK1
hsa_gmr069451	0.0126102	up	1.74393	1.74393	ZNF16
hsa_gmr009509	0.0229742	up	1.74379	1.74379	VIT
hsa_gmr000214	0.0372278	up	1.74343	1.74343	MTM1
hsa_gmr080621	0.00448844	up	1.74237	1.74237	CIITA
hsa_bmr040759	0.0117938	up	1.74205	1.74205	RAB22A
hsa_gmr072276	0.00437812	up	1.74108	1.74108	CASP7
hsa_gmr101052	0.0383838	up	1.73982	1.73982	ITGB8
hsa_gmr117689	0.00427954	up	1.73849	1.73849	STARD9
hsa_gmr010649	0.00926183	up	1.73725	1.73725	LRRC49
hsa_gmr120483	0.0415399	up	1.73706	1.73706	GREB1
hsa_gmr029920	0.00204148	up	1.73587	1.73587	MOK
hsa_gmr049588	0.00179605	up	1.7329	1.7329	PSD3
hsa_gmi060323	0.0320676	up	1.73249	1.73249	AFG1L
hsa_gmi058464	0.00482064	up	1.73219	1.73219	FOPNL
hsa_gmr006335	0.00459298	up	1.73197	1.73197	LMLN
hsa_gmr033612	0.00122954	up	1.73061	1.73061	ARL3
hsa_gmr034828	0.0145824	up	1.73055	1.73055	ACSM3
hsa_gmr019547	0.00073784	up	1.73053	1.73053	FOPNL
hsa_gmr099356	0.0205133	up	1.72949	1.72949	ROPN1L
hsa_bmr090084	0.0280161	up	1.72801	1.72801	BCL9L
hsa_gmr048668	8.988e-05	up	1.7275	1.7275	MSRB3
hsa_gmr020078	0.0426728	up	1.72603	1.72603	RPGRIP1L
hsa_gmr093311	0.028729	up	1.72583	1.72583	RAP1A
hsa_gmr088222	0.00174277	up	1.72569	1.72569	DHX37
hsa_gmr087876	0.00721982	up	1.72407	1.72407	IQCD
hsa_gmr022756	0.0474871	up	1.72401	1.72401	FASTKD1
hsa_gmr072281	0.00103647	up	1.72339	1.72339	ZDHHC16
hsa_gmr101919	0.00800261	up	1.72333	1.72333	HNF4G
hsa_gmr084579	0.004328	up	1.72269	1.72269	MTM1
hsa_gmr076716	0.00153758	up	1.72226	1.72226	FOXP4
hsa_gmr000443	0.0473978	up	1.7209	1.7209	F10
hsa_gmr111995	0.00263611	up	1.72083	1.72083	MMP24
hsa_gmr077688	0.0120106	up	1.72049	1.72049	KPNA7
hsa_gmi053989	0.0103641	up	1.71999	1.71999	CXCL1
hsa_gmr029960	0.0108842	up	1.7193	1.7193	ARHGEF9
hsa_gmr101920	0.00382927	up	1.71926	1.71926	HNF4G
hsa_gmr113798	0.00359014	up	1.7188	1.7188	SYTL4
hsa_gmr011424	0.0182318	up	1.71761	1.71761	LRTOMT
hsa_gmr008656	0.0472286	up	1.7173	1.7173	FAM13C
hsa_gmr019554	0.00779555	up	1.71682	1.71682	FOPNL
hsa_gmr014094	0.00156753	up	1.71579	1.71579	ZNF551
hsa_gmr117240	0.0136403	up	1.71504	1.71504	SIPA1L1
hsa_bmr000349	0.0317152	up	1.71345	1.71345	CYBB
hsa_gmr085451	0.0423335	up	1.71343	1.71343	VIT
hsa_gmi128848	0.00264535	up	1.71332	1.71332	ZDHHC16
hsa_gmi122888	0.035959	up	1.71297	1.71297	TRAF3IP1
hsa_bmr075379	0.0173385	up	1.71154	1.71154	IWS1
hsa_gmi123986	0.0243899	up	1.71059	1.71059	TTC21A
hsa_gmr073868	0.00112299	up	1.71014	1.71014	IFT27
hsa_gmr117814	0.000553837	up	1.70932	1.70932	COQ7
hsa_gmr029340	0.0409712	up	1.7091	1.7091	NEK11
hsa_gmr113654	0.023035	up	1.70819	1.70819	ZNF711
hsa_bmr045696	0.0315274	up	1.708	1.708	CENPBD1
hsa_gmr026025	0.00407299	up	1.70797	1.70797	ZNF525
hsa_gmr032664	0.00457349	up	1.70645	1.70645	TCF3
hsa_gmi051083	0.000418404	up	1.70584	1.70584	LMLN
hsa_gmr064229	0.000352735	up	1.70581	1.70581	TPPP
hsa_gmr102861	0.00871491	up	1.70566	1.70566	CNTLN
hsa_gmr115355	0.00680463	up	1.70534	1.70534	TNC
hsa_gmr098604	2.50195e-06	up	1.70437	1.70437	TPPP
hsa_gmr018901	0.0201161	up	1.70393	1.70393	ABLIM3
hsa_gmr113656	0.0245924	up	1.70251	1.70251	ZNF711
hsa_gmi135233	0.0148457	up	1.70179	1.70179	BPHL
hsa_gmr116650	0.015171	up	1.7017	1.7017	MSRB3
hsa_gmr014708	0.000257911	up	1.7014	1.7014	GANAB
hsa_gmr098743	0.041104	up	1.70137	1.70137	ADAMTS19
hsa_gmr119152	0.00142161	up	1.70113	1.70113	ZNF426
hsa_gmr094471	0.022397	up	1.70107	1.70107	CCDC138
hsa_gmr022754	0.017613	up	1.70086	1.70086	FASTKD1
hsa_gmr104232	0.00121438	up	1.70011	1.70011	ZDHHC16
hsa_gmi058467	8.09324e-05	up	1.69996	1.69996	FOPNL
hsa_gmr078978	0.000273929	up	1.69884	1.69884	HSDL2
hsa_gmr071963	0.000821375	up	1.69843	1.69843	CNTRL
hsa_bmr019684	0.0110496	up	1.69813	1.69813	MED11
hsa_gmr007729	0.00678396	up	1.69787	1.69787	MTHFSD
hsa_gmr016308	0.0104436	up	1.69757	1.69757	NOLC1
hsa_gmr019555	0.000626674	up	1.69732	1.69732	FOPNL
hsa_gmr101051	0.000652237	up	1.69726	1.69726	ITGB8
hsa_gmr080628	0.000116727	up	1.69706	1.69706	CIITA
hsa_gmi131982	0.0352929	up	1.69695	1.69695	KLHDC4
hsa_gmr104227	0.0102712	up	1.69623	1.69623	ZDHHC16
hsa_gmr023959	0.012693	up	1.69533	1.69533	FSIP1
hsa_gmr118026	0.0145681	up	1.69455	1.69455	NDRG4
hsa_gmr099611	0.00633913	up	1.6943	1.6943	STXBP5
hsa_gmr043209	0.00421793	up	1.6943	1.6943	PCNX3
hsa_gmr087310	0.00612654	up	1.69416	1.69416	SIPA1L1
hsa_gmr037786	0.0286208	up	1.69275	1.69275	TECPR2
hsa_gmr102757	0.00014796	up	1.69231	1.69231	TNC
hsa_gmr081599	0.0177144	up	1.69179	1.69179	ITGA2B
hsa_gmr101834	0.011234	up	1.69179	1.69179	PSD3
hsa_gmr039062	0.0162948	up	1.6894	1.6894	THEG
hsa_gmr118006	0.00910775	up	1.68877	1.68877	ACSM3
hsa_gmr069854	0.00105061	up	1.68845	1.68845	PRDX4
hsa_gmr045704	0.00024602	up	1.68787	1.68787	OSCP1
hsa_gmr009508	0.00108904	up	1.68772	1.68772	VIT
hsa_gmr092876	0.0487559	up	1.68769	1.68769	NFYC
hsa_gmr000373	0.000153386	up	1.68744	1.68744	L1CAM
hsa_bmr044533	0.000104391	up	1.68739	1.68739	FAM210B
hsa_gmr088223	1.86732e-05	up	1.6865	1.6865	DHX37
hsa_gmr063287	0.0386729	up	1.68636	1.68636	LOC101060017
hsa_gmr071205	0.0139592	up	1.68572	1.68572	LRP2BP
hsa_gmr098332	0.0053179	up	1.68461	1.68461	SETD7
hsa_gmi143798	0.048404	up	1.68409	1.68409	CCDC40
hsa_gmr111766	0.0121821	up	1.68407	1.68407	ZNF227
hsa_gmr102997	0.0145272	up	1.68368	1.68368	RFX3
hsa_gmr079115	0.0414042	up	1.68361	1.68361	ZNF25
hsa_gmi122917	0.00596931	up	1.68334	1.68334	ANXA4
hsa_gmr107670	0.0103937	up	1.68283	1.68283	GALNT16
hsa_gmr038151	0.0186283	up	1.68274	1.68274	RPGRIP1L
hsa_gmr107711	0.0117164	up	1.68255	1.68255	MOK
hsa_gmr019551	0.000539708	up	1.68239	1.68239	FOPNL
hsa_gmr105065	0.000747227	up	1.68143	1.68143	TTC12
hsa_bmr041479	0.0346998	up	1.68115	1.68115	FKBPL
hsa_gmr097596	0.0371259	up	1.68099	1.68099	SCLT1
hsa_gmr029680	0.0287206	up	1.67989	1.67989	IFT88
hsa_gmr072279	0.000644577	up	1.67974	1.67974	ZDHHC16
hsa_gmr027036	0.024566	up	1.67965	1.67965	RASGRP3
hsa_gmr027035	0.0429539	up	1.67942	1.67942	RASGRP3
hsa_gmr114258	0.0092238	up	1.6785	1.6785	FOXP4
hsa_gmr048235	0.0114191	up	1.67847	1.67847	MYLK3
hsa_gmr041008	0.000162246	up	1.67776	1.67776	BCL7A
hsa_gmr009146	0.0491712	up	1.67771	1.67771	LEFTY2
hsa_gmr043922	0.00624985	up	1.6774	1.6774	CASP7
hsa_gmr010004	0.0017666	up	1.67735	1.67735	COQ7
hsa_gmr017182	8.1959e-05	up	1.67696	1.67696	ZDHHC16
hsa_gmr020749	0.000832	up	1.67693	1.67693	ZNF426
hsa_gmr034009	0.0477517	up	1.6762	1.6762	CTDP1
hsa_gmr111774	0.00620567	up	1.67616	1.67616	ZNF227
hsa_gmr075022	0.00254517	up	1.67612	1.67612	CCDC138
hsa_gmr029328	0.0422098	up	1.67565	1.67565	NEK11
hsa_gmr020996	0.00929643	up	1.67564	1.67564	TTC12
hsa_gmr104226	0.00444856	up	1.67562	1.67562	ZDHHC16
hsa_gmr067447	0.0152406	up	1.67538	1.67538	NPHP1
hsa_gmr063670	0.0429921	up	1.67521	1.67521	COL4A3
hsa_gmr085391	0.00441376	up	1.67499	1.67499	RASGRP3
hsa_gmr047752	0.0164986	up	1.67485	1.67485	STARD13
hsa_gmr071949	0.0254669	up	1.67408	1.67408	RFX3
hsa_gmr071410	0.0046583	up	1.67347	1.67347	FOXP4
hsa_bmi057513	0.028952	up	1.67319	1.67319	PRSS23
hsa_gmr104231	0.000296062	up	1.67291	1.67291	ZDHHC16
hsa_gmr118378	0.00142702	up	1.67283	1.67283	CCDC40
hsa_gmi062526	0.00118396	up	1.67279	1.67279	IFT88
hsa_gmi062529	0.00286703	up	1.6722	1.6722	IFT88
hsa_gmr037507	0.0187007	up	1.67148	1.67148	ZNF232
hsa_gmr120079	0.00401984	up	1.6711	1.6711	ANXA4
hsa_gmr003596	0.00639612	up	1.67108	1.67108	DPH3
hsa_gmr014338	0.0448152	up	1.67085	1.67085	RGS7BP
hsa_gmi136045	0.0060232	up	1.66972	1.66972	ST5
hsa_gmr104223	0.00729812	up	1.66963	1.66963	CASP7
hsa_gmi058468	0.00121254	up	1.66925	1.66925	FOPNL
hsa_gmr023805	0.0499438	up	1.66707	1.66707	ZNF41
hsa_gmr113309	0.0365138	up	1.66492	1.66492	ARHGEF9
hsa_gmr087574	0.0332789	up	1.66466	1.66466	BBOF1
hsa_gmr010494	0.000495052	up	1.66461	1.66461	MAP7
hsa_gmr071040	0.0317638	up	1.66258	1.66258	IFT122
hsa_gmr002547	0.0142154	up	1.66241	1.66241	ZNF805
hsa_gmr111856	0.0222988	up	1.66215	1.66215	CEP89
hsa_gmr082295	0.0453564	up	1.66108	1.66108	HDHD2
hsa_gmr118212	0.00109235	up	1.65837	1.65837	CEP112
hsa_gmr038202	0.000571002	up	1.65828	1.65828	NUDCD3
hsa_gmr033440	0.0189328	up	1.65796	1.65796	PTK2B
hsa_gmr075217	0.0223139	up	1.65676	1.65676	NCKAP5
hsa_gmr101065	0.0126381	up	1.65634	1.65634	KPNA7
hsa_gmr037622	0.0475415	up	1.65626	1.65626	GREB1
hsa_gmr072464	0.00616595	up	1.65595	1.65595	CEP164
hsa_gmr078522	0.0190373	up	1.65588	1.65588	CNTRL
hsa_gmr047264	0.0283219	up	1.65563	1.65563	TRIML2
hsa_gmr024769	0.0354372	up	1.65551	1.65551	MKS1
hsa_gmr101805	0.00263822	up	1.65502	1.65502	FGFR1
hsa_bmr040358	0.0106136	up	1.65481	1.65481	TNXB
hsa_gmr048655	0.000378385	up	1.65346	1.65346	ZDHHC16
hsa_gmr047985	0.00132084	up	1.65265	1.65265	DCAF4
hsa_gmr078454	0.0177115	up	1.65239	1.65239	RFX3
hsa_gmr102464	0.0044756	up	1.65124	1.65124	CNTRL
hsa_gmr097137	0.00187083	up	1.6502	1.6502	KIF9
hsa_gmr112700	0.00583273	up	1.65012	1.65012	IFT27
hsa_gmi144416	0.0318444	up	1.65	1.65	C19orf44
hsa_gmr041549	0.00844345	up	1.6491	1.6491	KIF9
hsa_gmr068017	0.0287895	up	1.64886	1.64886	PMPCA
hsa_gmr111773	0.000224846	up	1.64871	1.64871	ZNF227
hsa_gmr068996	0.00694095	up	1.64847	1.64847	NOLC1
hsa_gmr096980	0.0384344	up	1.64835	1.64835	IFT122
hsa_gmr007987	0.0327631	up	1.64783	1.64783	POC1A
hsa_gmr103793	0.00120868	up	1.64783	1.64783	ANXA7
hsa_gmr041701	0.00988116	up	1.64779	1.64779	MEAF6
hsa_gmr091214	1.97222e-05	up	1.64766	1.64766	PCNX3
hsa_gmr077679	0.0160674	up	1.64702	1.64702	IRF5
hsa_gmr072282	0.000393002	up	1.64685	1.64685	ZDHHC16
hsa_gmr117924	0.0158133	up	1.6463	1.6463	CIITA
hsa_gmr024345	0.0132649	up	1.64622	1.64622	NTN4
hsa_gmr109097	0.0181952	up	1.64571	1.64571	CMTR2
hsa_gmr076715	0.000826368	up	1.6451	1.6451	FOXP4
hsa_gmr024159	0.0423929	up	1.64508	1.64508	VIT
hsa_gmr027775	0.00284771	up	1.64494	1.64494	FANK1
hsa_gmr007423	0.00179074	up	1.64477	1.64477	KPNA7
hsa_gmr070932	0.00213439	up	1.64363	1.64363	THOC7
hsa_gmr107450	0.0336685	up	1.64261	1.64261	SIPA1L1
hsa_gmr072293	0.0324065	up	1.6425	1.6425	FANK1
hsa_bmr045706	0.0210764	up	1.64104	1.64104	UBLCP1
hsa_gmi130154	0.00384533	up	1.64102	1.64102	PUS7L
hsa_gmi140734	0.00131544	up	1.64064	1.64064	ACOX3
hsa_gmi054875	0.0243772	up	1.64061	1.64061	ZNF551
hsa_gmr029998	0.00454506	up	1.64036	1.64036	KDM5C
hsa_gmr076717	0.00146442	up	1.64003	1.64003	FOXP4
hsa_gmi133304	0.0132376	up	1.63984	1.63984	TCF3
hsa_gmr042318	0.00677308	up	1.63965	1.63965	MORN1
hsa_gmr099585	0.00250687	up	1.63934	1.63934	FOXP4
hsa_gmr091894	0.00114066	up	1.63851	1.63851	NUDC
hsa_gmr109697	0.0192141	up	1.638	1.638	SLC39A11
hsa_gmr019211	0.0209899	up	1.63765	1.63765	LIPI
hsa_gmi132960	0.0174892	up	1.63733	1.63733	LDLRAD4
hsa_gmr071964	0.00171084	up	1.63702	1.63702	CNTRL
hsa_bmr077949	0.00109524	up	1.63692	1.63692	KHDRBS3
hsa_gmr107549	0.0134594	up	1.63647	1.63647	CCDC88C
hsa_gmr006922	2.39937e-05	up	1.6338	1.6338	L1CAM
hsa_gmr069907	0.00725796	up	1.63253	1.63253	MTM1
hsa_gmr080242	0.000816297	up	1.63246	1.63246	LRRC49
hsa_gmr018920	0.0466746	up	1.63238	1.63238	PCYOX1L
hsa_gmi146895	0.00265918	up	1.63237	1.63237	MOK
hsa_gmr093950	0.035642	up	1.63197	1.63197	ANGEL2
hsa_gmr069030	0.0116689	up	1.63172	1.63172	OSCP1
hsa_gmi060861	0.0335161	up	1.63161	1.63161	ATG13
hsa_gmr067748	0.0305844	up	1.6312	1.6312	TTC21A
hsa_gmr078523	0.00275698	up	1.63114	1.63114	CNTRL
hsa_gmr078733	0.0263138	up	1.63096	1.63096	TNC
hsa_gmr041870	0.000156956	up	1.63071	1.63071	L1CAM
hsa_gmr000367	0.0322978	up	1.63026	1.63026	ITGA2B
hsa_gmr016785	0.0474919	up	1.62968	1.62968	CALML4
hsa_gmr083323	0.0185817	up	1.62914	1.62914	WFDC5
hsa_gmr089018	0.0339639	up	1.62839	1.62839	FANK1
hsa_gmr104225	0.000299924	up	1.62818	1.62818	ZDHHC16
hsa_gmr066566	0.00469884	up	1.62795	1.62795	ZNF227
hsa_gmr104228	0.000581137	up	1.62754	1.62754	ZDHHC16
hsa_gmr110592	0.00108301	up	1.62738	1.62738	FECH
hsa_gmr009240	0.00228332	up	1.62588	1.62588	FOXP2
hsa_gmr019550	0.00259351	up	1.62578	1.62578	FOPNL
hsa_gmi138163	0.0183182	up	1.62564	1.62564	RAB7A
hsa_gmr038900	0.0370863	up	1.62551	1.62551	CPA4
hsa_gmr100587	0.000296956	up	1.6254	1.6254	AKAP12
hsa_gmr071665	0.0301121	up	1.62339	1.62339	CUX1
hsa_gmr016365	0.000831847	up	1.62324	1.62324	THOC7
hsa_gmr083225	0.00236903	up	1.6232	1.6232	HDGFL2
hsa_gmr009506	4.70863e-05	up	1.62298	1.62298	VIT
hsa_gmr107140	0.0472535	up	1.62271	1.62271	IFT88
hsa_gmi145973	0.00220192	up	1.62255	1.62255	KIF9
hsa_gmr045523	0.0402923	up	1.62252	1.62252	SCLT1
hsa_gmr023817	0.000227377	up	1.62215	1.62215	ZNF41
hsa_gmr079634	0.035178	up	1.62178	1.62178	TRIM66
hsa_gmr117779	0.00888301	up	1.62165	1.62165	SLC28A1
hsa_gmi053913	0.00608351	up	1.62154	1.62154	IFT43
hsa_gmr069145	0.00133539	up	1.62142	1.62142	ST7L
hsa_gmr017233	0.00408806	up	1.62081	1.62081	ZKSCAN7
hsa_gmr017656	4.05183e-05	up	1.62056	1.62056	ZNF227
hsa_gmr016307	0.00674357	up	1.62027	1.62027	NOLC1
hsa_gmi148083	0.00152798	up	1.62007	1.62007	MORN1
hsa_gmr017650	0.00539492	up	1.61938	1.61938	ZNF227
hsa_gmr023523	0.014712	up	1.61901	1.61901	TASP1
hsa_gmr004162	0.0265775	up	1.61853	1.61853	ZNF133
hsa_gmr014900	0.0463622	up	1.61847	1.61847	PKD1L2
hsa_gmi148077	0.00573272	up	1.6184	1.6184	ST3GAL3
hsa_gmr113653	0.0478926	up	1.61813	1.61813	ZNF711
hsa_gmr006029	0.0050299	up	1.61801	1.61801	TRMT10A
hsa_gmr107850	0.0421696	up	1.61798	1.61798	CDKL1
hsa_gmr067549	0.0299545	up	1.61753	1.61753	UBXN2A
hsa_gmr011040	0.0375755	up	1.6172	1.6172	ROPN1L
hsa_gmr116593	0.0220586	up	1.61715	1.61715	TMTC2
hsa_gmr111763	0.00890805	up	1.61591	1.61591	ZNF227
hsa_gmr029689	0.0472317	up	1.61587	1.61587	IFT88
hsa_gmr083850	0.0254805	up	1.61573	1.61573	AGPAT3
hsa_gmr093000	0.000537221	up	1.61531	1.61531	ST7L
hsa_gmr106147	0.0403107	up	1.61506	1.61506	PPHLN1
hsa_gmr096765	0.0195381	up	1.61481	1.61481	ARHGEF3
hsa_gmr086920	0.0177458	up	1.6144	1.6144	ERMARD
hsa_bmr043390	0.0358749	up	1.6119	1.6119	JAGN1
hsa_gmr046329	0.00134225	up	1.61185	1.61185	TMTC2
hsa_gmr001147	0.00562852	up	1.61135	1.61135	THOC5
hsa_gmr065502	0.0208339	up	1.61043	1.61043	KDM2B
hsa_gmr119136	0.0364932	up	1.61032	1.61032	TCF3
hsa_gmr072017	0.00566788	up	1.60957	1.60957	TNC
hsa_gmr079640	0.0494682	up	1.60935	1.60935	TRIM66
hsa_gmr071581	0.00135801	up	1.6093	1.6093	MAP7
hsa_gmr007424	0.0186486	up	1.60919	1.60919	KPNA7
hsa_gmr011315	0.0139583	up	1.60745	1.60745	NPR3
hsa_gmi121932	0.00807121	up	1.60539	1.60539	ST3GAL3
hsa_gmr118071	0.0011997	up	1.60489	1.60489	CRISPLD2
hsa_gmr021083	0.011083	up	1.60457	1.60457	ATAT1
hsa_gmi132342	0.0431545	up	1.60446	1.60446	RNF157
hsa_gmr066495	0.00690003	up	1.60406	1.60406	BICRA
hsa_gmr029854	0.00507297	up	1.60347	1.60347	CLHC1
hsa_gmr119847	0.0113336	up	1.60304	1.60304	LOC105377805
hsa_gmr097274	0.0486743	up	1.60256	1.60256	NEK11
hsa_gmr028274	0.00861484	up	1.60245	1.60245	RGS3
hsa_gmr006062	0.029501	up	1.6015	1.6015	KIF9
hsa_gmr094629	6.12333e-05	up	1.6009	1.6009	FN1
hsa_gmr064697	0.0228466	up	1.60039	1.60039	CUX1
hsa_gmr041832	0.0187226	up	1.60036	1.60036	OTUB2
hsa_gmr091688	0.00182574	up	1.60034	1.60034	ACSM3
hsa_gmr111788	0.00515641	up	1.59971	1.59971	ZNF426
hsa_gmr108303	0.00686626	up	1.59952	1.59952	LRRC49
hsa_gmr021568	0.0358332	up	1.5989	1.5989	ZFP69
hsa_gmr010347	0.0312121	up	1.59818	1.59818	ARL14EPL
hsa_gmr014669	0.000144557	up	1.59758	1.59758	L1CAM
hsa_gmr069497	0.0353777	up	1.59755	1.59755	RPGR
hsa_gmr012925	0.0053881	up	1.59749	1.59749	SEMA5B
hsa_gmr046940	0.000391259	up	1.5971	1.5971	RNF39
hsa_gmr021469	0.0489833	up	1.59639	1.59639	CAPRIN2
hsa_gmr010495	0.00230866	up	1.59629	1.59629	MAP7
hsa_gmr045720	0.0276618	up	1.59609	1.59609	STAC3
hsa_gmr101056	0.0394534	up	1.59592	1.59592	ITGB8
hsa_gmr038130	0.0014498	up	1.59577	1.59577	BICD2
hsa_bmr105603	0.00567275	up	1.59566	1.59566	ADCY6
hsa_gmr116038	0.00814082	up	1.59565	1.59565	FANK1
hsa_gmr043337	0.0106981	up	1.59552	1.59552	MSANTD4
hsa_gmr030203	0.0200309	up	1.59523	1.59523	SIPA1L1
hsa_gmr029584	0.00335969	up	1.59522	1.59522	CYB5RL
hsa_gmr074436	0.00185795	up	1.59514	1.59514	PPOX
hsa_gmr110543	0.0426575	up	1.59494	1.59494	ANKRD29
hsa_gmr081409	0.000258592	up	1.59487	1.59487	RNF157
hsa_gmr104229	0.000344349	up	1.5948	1.5948	ZDHHC16
hsa_gmr080813	0.0487063	up	1.59439	1.59439	RPGRIP1L
hsa_gmr040389	0.0167346	up	1.59434	1.59434	ZNF26
hsa_gmr016357	0.00165375	up	1.59419	1.59419	RCAN1
hsa_gmr118010	0.00635873	up	1.59389	1.59389	ACSM3
hsa_gmr084578	0.0227104	up	1.59383	1.59383	MTM1
hsa_gmr048654	0.000174473	up	1.59256	1.59256	ZDHHC16
hsa_bmr068301	0.00967114	up	1.59252	1.59252	IFI27L1
hsa_gmr074905	0.0122438	up	1.5923	1.5923	LYPD1
hsa_gmi126306	0.0402338	up	1.59224	1.59224	RMND1
hsa_gmi138236	0.0451908	up	1.59192	1.59192	CC2D1B
hsa_gmi126308	0.00864851	up	1.59148	1.59148	LRRC1
hsa_gmr080001	0.0145492	up	1.59131	1.59131	ZSCAN29
hsa_gmr079498	0.0112775	up	1.59078	1.59078	CDHR5
hsa_gmr074450	0.0348915	up	1.59052	1.59052	GPATCH2
hsa_gmr078788	0.00181483	up	1.58886	1.58886	C9orf78
hsa_gmr100216	0.00177873	up	1.58876	1.58876	EXOC2
hsa_gmr041009	0.00115715	up	1.58861	1.58861	BCL7A
hsa_gmr081700	0.00394972	up	1.5886	1.5886	MKS1
hsa_gmr003687	0.0309451	up	1.58838	1.58838	WIPF1
hsa_gmr017078	0.0434201	up	1.58804	1.58804	IQCE
hsa_gmi053937	0.00263838	up	1.58789	1.58789	C11orf45
hsa_gmr029342	0.0439671	up	1.58769	1.58769	NEK11
hsa_gmr075516	0.00292968	up	1.58728	1.58728	WIPF1
hsa_gmr082764	0.000252536	up	1.58656	1.58656	ZNF227
hsa_gmr033375	0.00284404	up	1.58634	1.58634	ANXA7
hsa_gmr116648	7.22757e-05	up	1.58446	1.58446	MSRB3
hsa_gmr100586	0.0147011	up	1.58416	1.58416	AKAP12
hsa_gmr013051	0.000312156	up	1.58408	1.58408	PPDPFL
hsa_gmr014301	0.0154545	up	1.58402	1.58402	PUS7L
hsa_gmr000079	0.00638184	up	1.58402	1.58402	COL5A1
hsa_gmr019345	0.00473924	up	1.58402	1.58402	TRIML2
hsa_gmr099145	0.0032379	up	1.58401	1.58401	TENM2
hsa_gmr003307	0.00876035	up	1.58396	1.58396	ZNF765
hsa_gmr092410	0.010422	up	1.58364	1.58364	FMO5
hsa_gmr009136	0.00526816	up	1.58327	1.58327	NEXN
hsa_gmi126937	0.000211639	up	1.58238	1.58238	ATXN7L1
hsa_gmr066926	0.000560777	up	1.58196	1.58196	PFKL
hsa_gmr002604	0.00280271	up	1.58192	1.58192	BCL7A
hsa_gmr089104	0.0205709	up	1.58189	1.58189	NUDC
hsa_bmr014128	0.0123542	up	1.58177	1.58177	ATRIP
hsa_gmi149348	0.00108349	up	1.58163	1.58163	COQ7
hsa_gmi139192	0.000501408	up	1.58132	1.58132	TCOF1
hsa_gmi137125	0.00365588	up	1.58126	1.58126	CEP89
hsa_gmr043634	0.00774652	up	1.58057	1.58057	CEP19
hsa_bmr109677	0.00787278	up	1.58035	1.58035	KRT24
hsa_gmr046180	0.0242507	up	1.58025	1.58025	KCTD18
hsa_gmr087762	0.00636886	up	1.57999	1.57999	ABLIM3
hsa_gmr100869	0.000988868	up	1.57988	1.57988	NUDCD3
hsa_gmr070258	0.000393664	up	1.57986	1.57986	SPATA17
hsa_gmr020310	0.0284488	up	1.57933	1.57933	ZNF510
hsa_gmr065922	0.00595316	up	1.57923	1.57923	MTHFSD
hsa_gmr063718	0.0213782	up	1.57905	1.57905	FN1
hsa_gmr073291	0.0341741	up	1.57898	1.57898	SLC39A11
hsa_gmr048773	0.000731475	up	1.57898	1.57898	GANAB
hsa_gmr004747	0.00622532	up	1.57894	1.57894	IFT43
hsa_gmr029918	0.0156915	up	1.57859	1.57859	MOK
hsa_gmr065473	0.0171383	up	1.5784	1.5784	IQCD
hsa_gmr042908	0.0126974	up	1.57768	1.57768	PUS7L
hsa_bmr072022	0.0468	up	1.57748	1.57748	IDNK
hsa_gmr105209	0.0265556	up	1.57737	1.57737	SPTBN2
hsa_gmi147285	0.0208039	up	1.57729	1.57729	GTSF1
hsa_gmr080619	0.0230871	up	1.57726	1.57726	CIITA
hsa_gmi139822	0.0428905	up	1.57721	1.57721	ATP6V1C2
hsa_gmi122042	0.0364537	up	1.57669	1.57669	ANGEL2
hsa_bmi136048	0.0259767	up	1.57661	1.57661	ST5
hsa_gmr063707	0.00566664	up	1.57658	1.57658	FN1
hsa_gmi130715	0.0153039	up	1.57553	1.57553	IFT88
hsa_gmr063639	0.031386	up	1.57552	1.57552	GREB1
hsa_gmr066925	0.00155814	up	1.57481	1.57481	PFKL
hsa_gmr002605	0.00238222	up	1.57458	1.57458	BCL7A
hsa_gmr039352	0.00227185	up	1.57448	1.57448	LRRC49
hsa_gmr091794	0.0428387	up	1.57432	1.57432	LOC101928592
hsa_gmr045071	0.00489374	up	1.57421	1.57421	ZNF251
hsa_gmr089860	0.0108736	up	1.57411	1.57411	MORN1
hsa_gmr036190	0.018307	up	1.57377	1.57377	TPPP
hsa_gmr116040	0.00169863	up	1.57375	1.57375	FANK1
hsa_gmr001682	0.00103334	up	1.57362	1.57362	YBEY
hsa_gmr006138	0.0284882	up	1.57287	1.57287	LRRC23
hsa_gmr043456	0.00248888	up	1.57266	1.57266	KDM2B
hsa_gmr100969	0.0102408	up	1.57265	1.57265	GRB10
hsa_gmr102756	0.0123825	up	1.57189	1.57189	TNC
hsa_gmr107874	0.000235193	up	1.5718	1.5718	MTA1
hsa_gmr010498	0.00101056	up	1.57164	1.57164	MAP7
hsa_gmr029677	0.0251362	up	1.57142	1.57142	IFT88
hsa_gmr003961	0.042831	up	1.5713	1.5713	CCDC159
hsa_gmr010261	0.01904	up	1.57127	1.57127	C16orf95
hsa_gmr077028	0.00949448	up	1.57118	1.57118	ZSCAN26
hsa_gmr080812	0.0389703	up	1.57078	1.57078	RPGRIP1L
hsa_gmr119494	0.000877964	up	1.57067	1.57067	PFKL
hsa_gmr110029	0.00884118	up	1.57065	1.57065	MKS1
hsa_gmr086782	0.00191277	up	1.57043	1.57043	AFG1L
hsa_gmi059236	0.0401871	up	1.5703	1.5703	UCK1
hsa_gmr063706	0.00475968	up	1.57004	1.57004	FN1
hsa_gmr049422	0.000151579	up	1.56992	1.56992	G3BP2
hsa_gmr117541	0.0138617	up	1.56988	1.56988	MORN1
hsa_gmr046370	0.00426578	up	1.56967	1.56967	TCEANC
hsa_gmr006839	0.0199664	up	1.56874	1.56874	FAM13C
hsa_gmr116649	0.00127627	up	1.56864	1.56864	MSRB3
hsa_gmr072018	0.0340136	up	1.56848	1.56848	TNC
hsa_gmr034528	0.000178177	up	1.56847	1.56847	GTF2H1
hsa_gmr042541	0.000256013	up	1.56763	1.56763	RNF39
hsa_gmi140470	0.00303526	up	1.56724	1.56724	DZIP3
hsa_gmr119155	0.00273953	up	1.56723	1.56723	ZNF426
hsa_gmr096986	0.0390277	up	1.56702	1.56702	IFT122
hsa_gmi051082	0.0054632	up	1.56659	1.56659	LMLN
hsa_gmi060965	0.0313278	up	1.56609	1.56609	ARHGAP22
hsa_gmr004857	0.00840069	up	1.56588	1.56588	ZNF83
hsa_gmr001230	5.23857e-05	up	1.56565	1.56565	BICD2
hsa_gmr117696	0.00552804	up	1.56557	1.56557	SYNC
hsa_gmr003616	0.0009985	up	1.5655	1.5655	C9orf116
hsa_gmr111789	0.000857252	up	1.56536	1.56536	ZNF426
hsa_gmi128707	0.0342911	up	1.56499	1.56499	CPEB3
hsa_gmr001211	0.00148122	up	1.56484	1.56484	GLE1
hsa_gmr104330	0.0003983	up	1.56474	1.56474	FANK1
hsa_bmr107796	0.0103236	up	1.56408	1.56408	NUBPL
hsa_gmi061653	0.00563016	up	1.56375	1.56375	SUPT3H
hsa_gmr083605	0.0230421	up	1.56368	1.56368	NINL
hsa_gmr108825	0.00700392	up	1.56326	1.56326	RPGRIP1L
hsa_gmr119153	0.00192888	up	1.56318	1.56318	ZNF426
hsa_bmr097189	0.000415483	up	1.56313	1.56313	TGFBR2
hsa_gmr078535	0.041326	up	1.56269	1.56269	ZNF618
hsa_gmi143478	0.0248384	up	1.56236	1.56236	RPGRIP1L
hsa_gmr013854	0.0178584	up	1.56225	1.56225	PAAF1
hsa_gmr049635	0.00890802	up	1.56215	1.56215	NAALADL2
hsa_gmr048653	0.00116724	up	1.56196	1.56196	ZDHHC16
hsa_gmr116652	0.00119521	up	1.56182	1.56182	MSRB3
hsa_gmr101066	0.00307587	up	1.56166	1.56166	KPNA7
hsa_gmr029684	0.0211411	up	1.56144	1.56144	IFT88
hsa_gmr029883	0.0418995	up	1.5612	1.5612	APBA2
hsa_gmr042436	0.00096091	up	1.56085	1.56085	THOC7
hsa_gmr111765	0.000630194	up	1.56081	1.56081	ZNF227
hsa_gmr100442	0.00316978	up	1.56051	1.56051	RNF39
hsa_gmr034034	0.0148927	up	1.56043	1.56043	NOLC1
hsa_gmr071579	0.000299003	up	1.56042	1.56042	MAP7
hsa_gmr073080	0.00472828	up	1.56025	1.56025	CIITA
hsa_bmr034754	0.00501166	up	1.55943	1.55943	ING1
hsa_gmr074832	0.00275615	up	1.55877	1.55877	NOL10
hsa_gmr101760	0.00800798	up	1.55832	1.55832	TSNARE1
hsa_gmr118009	0.00593369	up	1.55777	1.55777	ACSM3
hsa_gmi138579	0.0329591	up	1.55764	1.55764	FPGS
hsa_gmr017364	0.0439034	up	1.55754	1.55754	VSTM1
hsa_gmr020095	0.00176132	up	1.55747	1.55747	ANKMY1
hsa_gmr041633	0.0263782	up	1.55694	1.55694	XRCC4
hsa_gmr102497	0.00491967	up	1.55677	1.55677	COL5A1
hsa_gmr117217	0.0102967	up	1.55587	1.55587	ESRRB
hsa_gmr076526	0.0134525	up	1.55559	1.55559	CDH12
hsa_gmr099278	0.0105141	up	1.55544	1.55544	XRCC4
hsa_gmr071580	0.000723694	up	1.55535	1.55535	MAP7
hsa_gmr115956	0.00042092	up	1.5551	1.5551	BICC1
hsa_gmr045070	0.0036236	up	1.55488	1.55488	ZNF251
hsa_gmr048232	0.0157123	up	1.55486	1.55486	ZNF227
hsa_gmr112575	7.08568e-05	up	1.55475	1.55475	PFKL
hsa_gmr020498	0.00753425	up	1.55467	1.55467	C5
hsa_gmr104490	0.00224017	up	1.55453	1.55453	SF3B2
hsa_gmr119154	0.000901866	up	1.55394	1.55394	ZNF426
hsa_gmr100974	0.0105685	up	1.55362	1.55362	GRB10
hsa_gmr022192	0.0205415	up	1.55336	1.55336	MKS1
hsa_gmr111762	0.00215143	up	1.55326	1.55326	ZNF227
hsa_gmr038743	0.00311448	up	1.55269	1.55269	COQ7
hsa_gmi138929	0.00740063	up	1.55251	1.55251	ST7L
hsa_gmr023293	0.025561	up	1.55223	1.55223	IQCG
hsa_gmr025831	0.0383241	up	1.55182	1.55182	FAM13C
hsa_gmr019553	0.0033612	up	1.55129	1.55129	FOPNL
hsa_gmr032135	0.000473735	up	1.55097	1.55097	PFKL
hsa_gmr025808	0.00646062	up	1.55094	1.55094	ARHGAP22
hsa_gmr069543	0.000641391	up	1.55026	1.55026	SPATA17
hsa_gmr115667	0.00562882	up	1.54963	1.54963	ZNF438
hsa_gmr071773	0.00818858	up	1.54934	1.54934	CTSB
hsa_gmr101072	0.0226324	up	1.54901	1.54901	KPNA7
hsa_gmr080626	0.000780353	up	1.54885	1.54885	CIITA
hsa_gmr077485	0.039305	up	1.54869	1.54869	CUX1
hsa_gmr041198	0.00087275	up	1.54834	1.54834	NTN4
hsa_gmr024752	0.0149519	up	1.5481	1.5481	CRYAB
hsa_gmr082765	0.00175734	up	1.54764	1.54764	ZNF227
hsa_gmr100952	0.0022302	up	1.54736	1.54736	GRB10
hsa_gmr010502	0.000333749	up	1.54718	1.54718	MAP7
hsa_gmr111764	0.00278184	up	1.54679	1.54679	ZNF227
hsa_gmi060646	0.000588767	up	1.54613	1.54613	HEATR3
hsa_gmr107795	0.029469	up	1.5461	1.5461	BBOF1
hsa_gmr115922	0.00187516	up	1.54595	1.54595	SVIL
hsa_gmr073732	0.0180703	up	1.54564	1.54564	RIN2
hsa_gmr087113	0.00111306	up	1.5454	1.5454	MAP7
hsa_gmr041953	0.00254731	up	1.54511	1.54511	ZNF426
hsa_gmr045264	0.00215829	up	1.54496	1.54496	SPATA17
hsa_gmr079862	0.0323661	up	1.54495	1.54495	PTPN6
hsa_gmr068998	0.000952376	up	1.54481	1.54481	FANK1
hsa_gmr100870	0.000680717	up	1.5445	1.5445	NUDCD3
hsa_gmr068455	0.0103739	up	1.5445	1.5445	BBOF1
hsa_gmr001579	0.000303335	up	1.54416	1.54416	KDM2B
hsa_gmr072942	0.00572451	up	1.54409	1.54409	DENND4A
hsa_gmr049295	0.0122775	up	1.54408	1.54408	ACSM3
hsa_gmr020537	0.0152982	up	1.54252	1.54252	CDH12
hsa_gmi130714	0.0233428	up	1.54207	1.54207	IFT88
hsa_gmr031231	0.000461906	up	1.54156	1.54156	C5
hsa_gmr029583	0.0024909	up	1.54098	1.54098	CYB5RL
hsa_gmr019813	0.00592723	up	1.54084	1.54084	CCT5
hsa_gmr116428	0.0243881	up	1.54035	1.54035	ZNF202
hsa_gmr043574	0.0079826	up	1.53959	1.53959	CEP89
hsa_gmr026032	0.000364224	up	1.53938	1.53938	HDGFL2
hsa_gmr043274	0.000415022	up	1.53936	1.53936	ZDHHC16
hsa_gmr084740	0.0117311	up	1.53888	1.53888	PDLIM5
hsa_gmr063717	0.0138421	up	1.53865	1.53865	FN1
hsa_gmr088384	0.00490961	up	1.53844	1.53844	KDM2B
hsa_gmr095009	0.02111	up	1.5383	1.5383	NPHP1
hsa_gmr000809	0.00723127	up	1.53829	1.53829	NPR3
hsa_gmr099725	0.0156787	up	1.53803	1.53803	TBC1D32
hsa_gmr116039	0.0014195	up	1.53778	1.53778	FANK1
hsa_gmi058463	0.00428946	up	1.53771	1.53771	FOPNL
hsa_bmr085670	0.0432137	up	1.53749	1.53749	CISH
hsa_gmi139152	0.0228668	up	1.53736	1.53736	SCLT1
hsa_gmr090684	6.75754e-05	up	1.53723	1.53723	CDK16
hsa_gmr037851	0.00741052	up	1.5363	1.5363	CPEB3
hsa_gmr001082	0.000585781	up	1.53593	1.53593	PFKL
hsa_gmr011292	0.00211598	up	1.53585	1.53585	ZNF664
hsa_gmr044669	0.00606838	up	1.5358	1.5358	OPA1
hsa_gmr033011	0.00269184	up	1.53576	1.53576	SEMA7A
hsa_gmi055894	0.0436457	up	1.53543	1.53543	TRMT10B
hsa_gmi132377	1.27342e-05	up	1.53524	1.53524	NAT9
hsa_gmr094266	0.0174546	up	1.53513	1.53513	RABL2A
hsa_gmi141952	0.0475149	up	1.53506	1.53506	ZNF704
hsa_gmr009176	0.00398676	up	1.53494	1.53494	TECPR2
hsa_gmr012965	0.00533334	up	1.53482	1.53482	ARHGAP19
hsa_gmr047604	0.0472497	up	1.53447	1.53447	FAM151A
hsa_gmi144261	0.0267839	up	1.53412	1.53412	IGFL2
hsa_gmr021939	0.00611653	up	1.53398	1.53398	ANXA7
hsa_gmr119314	0.00125975	up	1.53388	1.53388	PCK1
hsa_gmr072006	0.000994109	up	1.53382	1.53382	GLE1
hsa_gmr103794	0.00483317	up	1.53376	1.53376	ANXA7
hsa_bmr072582	0.00673339	up	1.53334	1.53334	SNRNP35
hsa_gmr039546	0.0414061	up	1.53299	1.53299	RMND1
hsa_gmr022306	0.000229653	up	1.53282	1.53282	AHSA1
hsa_gmr096997	0.00130594	up	1.53257	1.53257	IFT122
hsa_gmr068751	0.00434957	up	1.53246	1.53246	HSD17B6
hsa_gmr104166	0.0029667	up	1.53238	1.53238	BICC1
hsa_gmr086751	0.0119872	up	1.53213	1.53213	CEP162
hsa_gmr104224	0.000952145	up	1.53166	1.53166	ZDHHC16
hsa_gmr116381	1.94381e-05	up	1.53149	1.53149	CEP126
hsa_gmr120994	0.0107368	up	1.53122	1.53122	IQCG
hsa_gmi128064	0.00129391	up	1.53063	1.53063	COL5A1
hsa_gmr101055	0.0266313	up	1.53062	1.53062	ITGB8
hsa_gmr101069	0.00678695	up	1.53053	1.53053	KPNA7
hsa_gmi051776	0.0154759	up	1.5305	1.5305	UFSP2
hsa_gmr112573	0.000748364	up	1.53025	1.53025	PFKL
hsa_gmr040160	0.00105131	up	1.53023	1.53023	RAC1
hsa_gmr093910	0.0040227	up	1.53022	1.53022	PER3
hsa_gmr006496	0.00636661	up	1.53009	1.53009	RASGRP3
hsa_gmr018670	0.00616857	up	1.52979	1.52979	HFE
hsa_gmr025516	0.0137845	up	1.52952	1.52952	PGAP2
hsa_gmr046252	0.0246201	up	1.52896	1.52896	RNF165
hsa_gmr020034	0.00300881	up	1.52893	1.52893	ANKRD29
hsa_gmr067744	0.0319667	up	1.52802	1.52802	TTC21A
hsa_gmi133306	5.62225e-05	up	1.52777	1.52777	TCF3
hsa_gmi062528	0.0148582	up	1.52757	1.52757	IFT88
hsa_gmr080469	0.0346836	up	1.52748	1.52748	CCDC33
hsa_gmr068841	0.0166591	up	1.52743	1.52743	CPEB3
hsa_gmr028429	0.000933412	up	1.52715	1.52715	TCF3
hsa_gmr102683	0.0162603	up	1.52656	1.52656	FPGS
hsa_gmr084507	0.0292753	up	1.52641	1.52641	ZNF711
hsa_gmr097495	0.0245565	up	1.52616	1.52616	EXOG
hsa_gmi052263	0.0232128	up	1.52544	1.52544	AGA
hsa_gmi132372	0.0135202	up	1.5247	1.5247	NAT9
hsa_gmr107240	0.0409743	up	1.52468	1.52468	LOC105377805
hsa_gmr069289	0.00799377	up	1.52467	1.52467	CEP126
hsa_gmr000951	0.00929786	up	1.52438	1.52438	GRB10
hsa_gmr007710	0.00447677	up	1.52437	1.52437	ANXA7
hsa_gmr005720	0.000695616	up	1.52409	1.52409	SYNGAP1
hsa_gmr097279	0.00274062	up	1.52407	1.52407	NEK11
hsa_gmr111095	0.0448664	up	1.52272	1.52272	CCDC159
hsa_gmr047929	0.0318442	up	1.52219	1.52219	MORN4
hsa_gmr067025	0.00653982	up	1.52192	1.52192	THOC5
hsa_gmr115793	0.00213565	up	1.52167	1.52167	C10orf143
hsa_gmr113447	0.0391909	up	1.5214	1.5214	MTM1
hsa_gmr111771	0.005461	up	1.52137	1.52137	ZNF227
hsa_gmr049194	0.000987187	up	1.5213	1.5213	PLEC
hsa_gmr101068	0.0207984	up	1.52086	1.52086	KPNA7
hsa_gmr078702	0.00217091	up	1.52066	1.52066	GLE1
hsa_gmr084855	0.00962409	up	1.52043	1.52043	TRIML2
hsa_gmr049559	0.00641937	up	1.5204	1.5204	OSCP1
hsa_gmr105699	0.0234579	up	1.52026	1.52026	TMTC2
hsa_bmr096756	0.024278	up	1.52005	1.52005	OGG1
hsa_gmr068570	0.000555851	up	1.51962	1.51962	TCOF1
hsa_gmr086589	0.0202388	up	1.51919	1.51919	CDADC1
hsa_gmr010698	0.0221313	up	1.51912	1.51912	CEP112
hsa_gmi138164	0.00709281	up	1.51886	1.51886	RAB7A
hsa_bmr037222	0.00826757	up	1.51869	1.51869	TM4SF1
hsa_gmi129382	0.0192231	up	1.51848	1.51848	TTC12
hsa_gmr111692	0.00195363	up	1.51847	1.51847	TCF3
hsa_gmr111693	0.000524372	up	1.51812	1.51812	TCF3
hsa_gmr104327	0.0252961	up	1.51801	1.51801	FANK1
hsa_gmr042423	0.0396066	up	1.51776	1.51776	PIF1
hsa_gmr002709	0.0127478	up	1.51774	1.51774	CCM2
hsa_gmr113448	0.0458436	up	1.51769	1.51769	MTM1
hsa_gmr042658	0.00295808	up	1.51721	1.51721	SETD7
hsa_gmr027034	0.00242772	up	1.51693	1.51693	RASGRP3
hsa_gmr065117	0.00475173	up	1.51678	1.51678	TNC
hsa_gmr064966	0.00490155	up	1.51664	1.51664	B4GALT1
hsa_gmr017653	0.000390854	up	1.51604	1.51604	ZNF227
hsa_gmr121527	0.0014378	up	1.51589	1.51589	TPPP
hsa_gmr088656	0.0476817	up	1.51586	1.51586	CPEB3
hsa_gmr034633	0.0018064	up	1.51567	1.51567	FOSL1
hsa_gmr022193	0.00248771	up	1.51541	1.51541	MKS1
hsa_gmi060659	0.00162007	up	1.5151	1.5151	HKR1
hsa_gmr074926	0.000511548	up	1.51502	1.51502	COL4A4
hsa_gmr013772	0.0025675	up	1.51466	1.51466	CASP7
hsa_gmr046226	0.000848402	up	1.51436	1.51436	ZNF664
hsa_gmr078415	0.0189306	up	1.51424	1.51424	UBAP1
hsa_gmr000944	4.5242e-05	up	1.51408	1.51408	HDGFL2
hsa_gmr072016	0.016441	up	1.51378	1.51378	TNC
hsa_gmr083226	0.00125508	up	1.51332	1.51332	HDGFL2
hsa_gmr093132	0.0212314	up	1.5132	1.5132	HHAT
hsa_gmr096988	0.00980144	up	1.51318	1.51318	IFT122
hsa_gmr105934	0.00757042	up	1.51265	1.51265	ANKRD52
hsa_gmr076936	0.0272419	up	1.51224	1.51224	TREM1
hsa_gmr025217	0.0194167	up	1.51196	1.51196	AGBL3
hsa_gmr110729	0.00560736	up	1.51193	1.51193	MBD1
hsa_gmi062230	0.0397786	up	1.51189	1.51189	TTC12
hsa_gmr008446	0.00529777	up	1.51165	1.51165	MKS1
hsa_gmr072174	0.0414166	up	1.51158	1.51158	GSTO2
hsa_bmr042599	0.0380879	up	1.51152	1.51152	LY6G5C
hsa_gmr046936	2.76428e-05	up	1.51152	1.51152	RNF39
hsa_gmr105509	0.0499172	up	1.51123	1.51123	TRIM66
hsa_bmr034110	0.0215771	up	1.51077	1.51077	NTN1
hsa_gmr100210	0.000539219	up	1.51058	1.51058	EXOC2
hsa_gmr024320	0.017042	up	1.5104	1.5104	ZNF25
hsa_gmr046104	0.00277529	up	1.51037	1.51037	TRMT10A
hsa_bmi132415	0.0123831	up	1.51024	1.51024	DERL2
hsa_gmr086943	0.0268381	up	1.50969	1.50969	NHSL1
hsa_gmr121476	9.21062e-05	up	1.50962	1.50962	G3BP2
hsa_gmr064139	0.00635554	up	1.50957	1.50957	DZIP3
hsa_gmr090196	0.0133181	up	1.50944	1.50944	SORL1
hsa_gmr107239	0.00622766	up	1.50918	1.50918	LOC105377805
hsa_gmr069526	0.0166637	up	1.50904	1.50904	FMO5
hsa_gmr010500	0.000371292	up	1.50888	1.50888	MAP7
hsa_gmr072019	0.00335908	up	1.5088	1.5088	TNC
hsa_gmr043702	0.00647959	up	1.50795	1.50795	PDGFB
hsa_gmr111768	0.00163695	up	1.50788	1.50788	ZNF227
hsa_gmr014662	0.00557583	up	1.50782	1.50782	COL5A1
hsa_gmr048437	0.0137646	up	1.50778	1.50778	HEATR3
hsa_gmr042738	0.012003	up	1.50771	1.50771	SLC2A11
hsa_gmr045198	0.0254728	up	1.50651	1.50651	GRIN3B
hsa_bmr036456	0.00542908	up	1.50627	1.50627	OGFR
hsa_gmr100211	0.00973395	up	1.5061	1.5061	EXOC2
hsa_gmr085992	0.02014	up	1.50599	1.50599	KIF9
hsa_gmr067781	0.0036627	up	1.50598	1.50598	RBMS3
hsa_gmr011293	0.0141511	up	1.50586	1.50586	ARHGAP19
hsa_gmr020201	0.00728777	up	1.50562	1.50562	CLNS1A
hsa_gmi137904	1.43399e-05	up	1.50548	1.50548	TTC27
hsa_gmr103164	0.0292249	up	1.50546	1.50546	C9orf3
hsa_gmr044230	0.0122763	up	1.50507	1.50507	VIT
hsa_bmr089019	0.0117626	up	1.50485	1.50485	FANK1
hsa_bmr112918	0.0221007	up	1.50463	1.50463	MICAL3
hsa_gmr094262	0.0217245	up	1.50451	1.50451	RABL2A
hsa_gmr006815	0.0244999	up	1.50426	1.50426	AMIGO2
hsa_gmr034342	0.00612699	up	1.50422	1.50422	AKAP12
hsa_gmr084309	0.0153288	up	1.50388	1.50388	DEPDC5
hsa_gmr045131	0.0298491	up	1.50373	1.50373	IQCD
hsa_gmr046941	0.00207384	up	1.50365	1.50365	RNF39
hsa_gmr099719	0.0181562	up	1.50359	1.50359	TBC1D32
hsa_gmi129431	0.00236264	up	1.50342	1.50342	ASRGL1
hsa_gmr069256	0.00219948	up	1.50342	1.50342	PHLDB1
hsa_gmr001753	0.0403804	up	1.50323	1.50323	ZNF182
hsa_gmr083162	0.00979415	up	1.50314	1.50314	TCF3
hsa_gmr014142	0.00303005	up	1.50243	1.50243	NKD2
hsa_gmr065270	0.00567142	up	1.50233	1.50233	MGMT
hsa_gmr017651	0.00214336	up	1.50229	1.50229	ZNF227
hsa_bmr067374	0.0168219	up	1.50202	1.50202	G3BP2
hsa_gmr089856	0.0138541	up	1.50184	1.50184	MORN1
hsa_gmr021789	0.0340273	up	1.50174	1.50174	ZFP30
hsa_gmr118157	0.00351863	up	1.50149	1.50149	HEXIM2
hsa_gmr004209	0.00600999	up	1.50142	1.50142	ASRGL1
hsa_gmr043484	0.0103459	up	1.50117	1.50117	HDGFL2
hsa_gmr043772	0.00340906	up	1.50098	1.50098	NKD2
hsa_gmr112576	7.92748e-05	up	1.50061	1.50061	PFKL
hsa_gmi053962	0.0426491	up	1.50054	1.50054	APOM
hsa_gmr082130	0.0457809	up	1.50022	1.50022	FECH
hsa_gmr013303	0.00238519	up	1.50015	1.50015	ARRB2
hsa_bmr113894	0.0247534	up	1.50011	1.50011	LOC105379417
hsa_gmr099398	0.000855781	up	1.49967	1.49967	NKD2
hsa_gmr118156	0.0339358	up	1.49964	1.49964	HEXIM2
hsa_gmi129312	0.0194603	up	1.49961	1.49961	CEP164
hsa_gmr045321	9.3515e-05	up	1.49956	1.49956	HFE
hsa_gmr095636	0.0012855	up	1.49921	1.49921	FAM161A
hsa_gmr016232	0.0145307	up	1.49918	1.49918	SERPINA9
hsa_gmr075644	0.0162627	up	1.49903	1.49903	DGKD
hsa_gmr030942	0.0026241	down	1.50004	-1.50004	DUSP4
hsa_gmr112011	0.0463336	down	1.50005	-1.50005	RNF24
hsa_bmi146361	0.0072343	down	1.50008	-1.50008	PDX1
hsa_gmr003482	4.65325e-05	down	1.50011	-1.50011	NF1
hsa_gmi057691	0.0401523	down	1.50013	-1.50013	LYRM7
hsa_gmr075694	0.0115558	down	1.50015	-1.50015	FER1L5
hsa_bmr106034	0.0174081	down	1.5002	-1.5002	SMCO3
hsa_gmr072571	0.00155865	down	1.50025	-1.50025	DUSP16
hsa_gmr016269	0.00242218	down	1.5006	-1.5006	CRELD2
hsa_gmr103028	0.00796099	down	1.50113	-1.50113	SUSD1
hsa_bmr114036	0.0477929	down	1.5012	-1.5012	PAM
hsa_gmr048368	0.0455972	down	1.50143	-1.50143	SLC7A8
hsa_gmr046221	0.00758099	down	1.50145	-1.50145	ARHGAP42
hsa_gmr083329	0.00137939	down	1.50155	-1.50155	LSM14B
hsa_gmr096027	0.00989766	down	1.50193	-1.50193	ARPP21
hsa_gmr072878	0.000837663	down	1.50207	-1.50207	JKAMP
hsa_gmr075473	0.000322682	down	1.5021	-1.5021	RAPH1
hsa_gmr079495	0.0497844	down	1.50235	-1.50235	CYB5R2
hsa_gmr006810	0.00149068	down	1.5024	-1.5024	LPAR5
hsa_gmr070675	0.00185725	down	1.50242	-1.50242	MGAT5
hsa_gmr048196	0.0319016	down	1.50253	-1.50253	APAF1
hsa_gmr078209	0.0432161	down	1.50304	-1.50304	JRK
hsa_gmi125571	0.0128268	down	1.50367	-1.50367	ARSB
hsa_gmr040637	0.000797403	down	1.5038	-1.5038	LPAR5
hsa_gmr079805	0.0114209	down	1.5043	-1.5043	SOX5
hsa_gmr070466	0.028478	down	1.50438	-1.50438	NTSR2
hsa_gmr096602	0.0452901	down	1.50461	-1.50461	C3orf35
hsa_gmr038981	7.03541e-05	down	1.50529	-1.50529	JKAMP
hsa_gmi142741	0.0007957	down	1.50551	-1.50551	CAPRIN1
hsa_gmr121506	0.0016383	down	1.50553	-1.50553	LHFPL2
hsa_bmr116249	0.0288386	down	1.50556	-1.50556	DCDC1
hsa_gmr082658	0.0394681	down	1.50565	-1.50565	POU2F2
hsa_gmr118437	0.0321845	down	1.50585	-1.50585	DNAI2
hsa_gmi128114	0.000751416	down	1.50591	-1.50591	PTGR1
hsa_gmr083325	0.00136409	down	1.50608	-1.50608	LSM14B
hsa_gmr017147	0.000164831	down	1.50682	-1.50682	FDFT1
hsa_bmr098793	0.00677602	down	1.50683	-1.50683	FBN2
hsa_gmi135094	0.0277914	down	1.50701	-1.50701	ARHGAP26
hsa_gmr020413	0.000187181	down	1.50714	-1.50714	LZIC
hsa_gmr102231	0.00204671	down	1.50762	-1.50762	DOCK5
hsa_gmr046921	0.00124191	down	1.5079	-1.5079	BDNF
hsa_gmr017475	0.0387301	down	1.50825	-1.50825	IFI27
hsa_gmr078352	0.00145852	down	1.5084	-1.5084	RNF38
hsa_gmr078867	0.0376408	down	1.50867	-1.50867	SUSD1
hsa_gmr095776	0.0128155	down	1.50883	-1.50883	SESTD1
hsa_gmr067547	0.0109326	down	1.50925	-1.50925	FBXO41
hsa_gmi060308	0.0438839	down	1.51004	-1.51004	FKBP1B
hsa_bmr098741	0.0135039	down	1.51074	-1.51074	ADAMTS19
hsa_gmr034823	0.0128134	down	1.51118	-1.51118	DLL1
hsa_gmr006288	0.0385483	down	1.51149	-1.51149	AGER
hsa_gmr009437	0.00121008	down	1.51191	-1.51191	CPEB2
hsa_gmr106674	0.000924132	down	1.51236	-1.51236	PLCZ1
hsa_gmr077059	0.00167667	down	1.51248	-1.51248	C6orf62
hsa_gmr069047	0.00430111	down	1.51258	-1.51258	AGL
hsa_bmr119831	0.0134091	down	1.51259	-1.51259	NLGN4Y
hsa_gmr114553	0.0180057	down	1.51267	-1.51267	ZNF273
hsa_gmi058609	0.00921131	down	1.51289	-1.51289	GPX8
hsa_gmr023404	0.0396338	down	1.51298	-1.51298	ST3GAL6
hsa_gmr002576	0.0105262	down	1.51339	-1.51339	SOD2
hsa_gmr012580	0.0161004	down	1.51369	-1.51369	SYT7
hsa_gmr048955	0.00372254	down	1.51375	-1.51375	SFTPB
hsa_gmr008654	0.047964	down	1.51419	-1.51419	SLC1A3
hsa_gmr017150	0.000492521	down	1.51458	-1.51458	FDFT1
hsa_gmr067444	0.00467758	down	1.5146	-1.5146	MGAT5
hsa_gmr101307	0.0308024	down	1.51462	-1.51462	WIPF3
hsa_gmr009908	0.0221464	down	1.51465	-1.51465	CORO2B
hsa_gmr032592	0.000279789	down	1.51476	-1.51476	SQLE
hsa_gmr108715	0.0188307	down	1.51482	-1.51482	TMEM170A
hsa_gmr039580	0.000340454	down	1.51489	-1.51489	CDCA4
hsa_gmr107809	0.000442277	down	1.51547	-1.51547	SGPP1
hsa_gmr024279	0.00219315	down	1.5155	-1.5155	INIP
hsa_gmi059953	0.0289229	down	1.51595	-1.51595	SULT1C4
hsa_gmr093767	0.00121904	down	1.51608	-1.51608	LZIC
hsa_gmr043104	0.0386459	down	1.51636	-1.51636	FCAMR
hsa_gmr004740	0.0300697	down	1.51639	-1.51639	RGS4
hsa_gmr092304	0.0146474	down	1.51704	-1.51704	ESRRG
hsa_gmr063983	0.0157259	down	1.51805	-1.51805	FETUB
hsa_gmr094964	0.00107316	down	1.51806	-1.51806	MGAT5
hsa_gmr037367	0.0142809	down	1.51839	-1.51839	FETUB
hsa_gmr066751	0.00370113	down	1.51882	-1.51882	LSM14B
hsa_gmr075017	0.0333597	down	1.5192	-1.5192	FAHD2B
hsa_gmr045870	0.00162421	down	1.51986	-1.51986	CDCA4
hsa_gmr105040	0.0409039	down	1.51998	-1.51998	CYB5R2
hsa_gmr040497	0.00522634	down	1.52012	-1.52012	DHX33
hsa_gmr017162	0.000763841	down	1.52051	-1.52051	FDFT1
hsa_gmr120321	0.00967476	down	1.52074	-1.52074	TPO
hsa_gmr019917	0.0285736	down	1.5208	-1.5208	FETUB
hsa_gmr090605	0.0186009	down	1.52093	-1.52093	SNCAIP
hsa_gmr043199	0.028111	down	1.52116	-1.52116	ARID5B
hsa_gmi060325	0.00863209	down	1.52172	-1.52172	SETD9
hsa_bmr001515	0.00371373	down	1.52202	-1.52202	OR2B3
hsa_gmr023862	0.00177458	down	1.52248	-1.52248	ELAVL4
hsa_gmr087427	5.02041e-05	down	1.52254	-1.52254	RBM23
hsa_gmr073299	0.0144229	down	1.52258	-1.52258	MMD
hsa_gmr000621	0.000912138	down	1.52259	-1.52259	ALDH2
hsa_gmr036402	0.046528	down	1.52281	-1.52281	CD300A
hsa_gmr069090	3.72747e-05	down	1.52303	-1.52303	DDAH1
hsa_gmr013494	0.0196366	down	1.52312	-1.52312	HAL
hsa_gmr085389	0.00388654	down	1.52312	-1.52312	LCLAT1
hsa_gmr034642	0.0133816	down	1.52341	-1.52341	RASSF9
hsa_gmr107748	0.0435882	down	1.52371	-1.52371	GPR135
hsa_gmr015604	0.00235963	down	1.52389	-1.52389	IDH1
hsa_gmr006099	0.0203745	down	1.52427	-1.52427	CRELD2
hsa_gmr073338	0.0056633	down	1.52497	-1.52497	RAPGEFL1
hsa_gmi059007	0.000210859	down	1.52513	-1.52513	IDI1
hsa_gmi058692	0.00282226	down	1.52535	-1.52535	SHH
hsa_gmr085621	0.00180537	down	1.52578	-1.52578	MKRN2OS
hsa_gmr030098	0.026071	down	1.5262	-1.5262	ZDHHC21
hsa_gmr044984	0.0162683	down	1.52703	-1.52703	MPIG6B
hsa_gmr000226	0.000681953	down	1.52764	-1.52764	NF1
hsa_gmr018058	0.0381896	down	1.52772	-1.52772	CCL4L2
hsa_gmr072722	0.0434603	down	1.5283	-1.5283	PUS7L
hsa_gmr091090	0.0235469	down	1.52848	-1.52848	NAT1
hsa_gmr079043	0.00325341	down	1.52884	-1.52884	PTGES
hsa_gmr044983	0.0314222	down	1.52913	-1.52913	MPIG6B
hsa_gmr047169	0.00256364	down	1.52914	-1.52914	TGIF1
hsa_gmr071366	0.000112809	down	1.52927	-1.52927	HRH2
hsa_gmr005666	0.00234677	down	1.52973	-1.52973	KCTD15
hsa_gmr118799	0.000999496	down	1.52999	-1.52999	ZBTB14
hsa_gmr034492	0.0494297	down	1.53011	-1.53011	GLUD1
hsa_gmr009731	0.0274693	down	1.53029	-1.53029	ADGRG2
hsa_gmr047295	0.00715926	down	1.53075	-1.53075	KCNRG
hsa_gmr079813	0.000116094	down	1.53081	-1.53081	DUSP16
hsa_gmr066022	0.0106433	down	1.5311	-1.5311	ODF4
hsa_gmi139359	0.00948047	down	1.53126	-1.53126	STAB2
hsa_gmr016268	0.00930562	down	1.53164	-1.53164	CRELD2
hsa_gmr064608	0.0107357	down	1.53173	-1.53173	ZDHHC4
hsa_gmi058691	0.0154369	down	1.53181	-1.53181	SHH
hsa_gmr075869	0.012032	down	1.53205	-1.53205	C3orf58
hsa_gmr068552	0.00396274	down	1.53213	-1.53213	PCDH1
hsa_gmr039177	0.00875596	down	1.53238	-1.53238	SIX4
hsa_gmi060607	0.0198134	down	1.53266	-1.53266	INIP
hsa_gmr090376	0.00246209	down	1.53326	-1.53326	FSTL4
hsa_gmr102423	0.00145113	down	1.53367	-1.53367	RABEPK
hsa_gmi125556	0.00246868	down	1.53415	-1.53415	ARHGAP26
hsa_gmr113405	0.00731158	down	1.5347	-1.5347	ZNF81
hsa_gmr093648	0.00031198	down	1.5347	-1.5347	PTP4A2
hsa_gmr112460	0.0322741	down	1.53484	-1.53484	LOC107984104
hsa_gmr008793	0.0492456	down	1.53568	-1.53568	TTC39B
hsa_gmr074580	2.32986e-05	down	1.53571	-1.53571	SOAT1
hsa_gmr019918	0.0127592	down	1.53588	-1.53588	FETUB
hsa_gmr113258	0.00194298	down	1.53591	-1.53591	CXorf38
hsa_gmr091884	0.0011777	down	1.536	-1.536	TXNIP
hsa_gmr108458	0.0123202	down	1.53643	-1.53643	TPM1
hsa_gmr111126	0.00560114	down	1.53736	-1.53736	FBXO27
hsa_gmr011576	0.0423854	down	1.53747	-1.53747	AGER
hsa_gmr070215	0.0488448	down	1.53759	-1.53759	NBPF3
hsa_gmr102425	0.00167501	down	1.53804	-1.53804	RABEPK
hsa_gmr072575	0.00498077	down	1.53808	-1.53808	SH2B3
hsa_gmi058430	0.0141543	down	1.5383	-1.5383	MUC21
hsa_bmr084430	0.0321701	down	1.53845	-1.53845	GJB1
hsa_gmr119271	0.00676276	down	1.53889	-1.53889	LSM14B
hsa_gmr119227	0.0392051	down	1.53933	-1.53933	GDF15
hsa_bmr001487	0.000606801	down	1.53944	-1.53944	OR8H1
hsa_gmr113768	0.0108398	down	1.53948	-1.53948	PPP1R3F
hsa_gmr033140	6.19102e-05	down	1.53956	-1.53956	EIF3J
hsa_bmr044225	0.000246997	down	1.53971	-1.53971	CCND1
hsa_gmr075308	0.00571279	down	1.54027	-1.54027	GULP1
hsa_gmr075704	0.0275994	down	1.54081	-1.54081	SESTD1
hsa_gmr105582	0.00453081	down	1.54117	-1.54117	FRS2
hsa_gmr019503	0.000541668	down	1.54148	-1.54148	LCLAT1
hsa_gmr100502	0.0345057	down	1.54162	-1.54162	VNN2
hsa_bmr107000	0.0179554	down	1.54163	-1.54163	TMEM255B
hsa_gmr083328	0.00282269	down	1.54266	-1.54266	LSM14B
hsa_gmr070158	0.0301928	down	1.54267	-1.54267	PQLC2
hsa_gmr104235	0.000243749	down	1.54267	-1.54267	PCGF5
hsa_gmi136502	0.000365817	down	1.54374	-1.54374	PTP4A2
hsa_gmr094658	0.00284305	down	1.54426	-1.54426	LCLAT1
hsa_gmr009330	0.00349686	down	1.54431	-1.54431	SPAM1
hsa_gmr042650	0.000130363	down	1.54442	-1.54442	DUSP16
hsa_gmr100203	0.000931202	down	1.5445	-1.5445	CARMIL1
hsa_gmi053139	0.0490169	down	1.5445	-1.5445	AGER
hsa_gmr015425	0.0331736	down	1.54484	-1.54484	ABR
hsa_gmr033652	0.0229838	down	1.54496	-1.54496	CDH7
hsa_gmr023015	0.0387758	down	1.54497	-1.54497	MUC21
hsa_gmr009107	0.00297851	down	1.54512	-1.54512	CDHR1
hsa_gmr088187	0.00325905	down	1.54519	-1.54519	SSH1
hsa_bmi137915	0.0362699	down	1.54608	-1.54608	SPTBN1
hsa_gmr042724	6.95394e-05	down	1.54664	-1.54664	SGPP1
hsa_gmr121158	0.0368536	down	1.54668	-1.54668	ESRRG
hsa_gmr008695	0.0175629	down	1.54711	-1.54711	CADM2
hsa_gmr075728	0.0217235	down	1.54716	-1.54716	HDAC4
hsa_gmr067402	0.000215577	down	1.54731	-1.54731	LZIC
hsa_gmr005716	0.0149793	down	1.54732	-1.54732	SLC44A5
hsa_gmr009907	0.0272691	down	1.54749	-1.54749	CORO2B
hsa_bmi130635	0.041411	down	1.5477	-1.5477	DLEU7
hsa_gmr005428	0.0424449	down	1.54775	-1.54775	SERPINA1
hsa_gmr090651	0.028138	down	1.54849	-1.54849	TNKS
hsa_gmr018047	0.0188132	down	1.54852	-1.54852	CCL4L2
hsa_gmr033441	0.00851963	down	1.54853	-1.54853	FASN
hsa_gmr023454	0.00508484	down	1.54866	-1.54866	OSMR
hsa_gmr009321	0.00199135	down	1.54882	-1.54882	CARMIL1
hsa_gmr093023	0.0015284	down	1.54906	-1.54906	SUSD4
hsa_gmr006564	0.0295503	down	1.54916	-1.54916	C5orf60
hsa_gmr072739	0.0265409	down	1.54935	-1.54935	BICDL1
hsa_gmr019854	0.00153144	down	1.55055	-1.55055	SLC38A2
hsa_gmr085606	0.000405631	down	1.55056	-1.55056	ARHGAP25
hsa_gmr044491	0.0094616	down	1.55098	-1.55098	TRPV1
hsa_gmr031273	0.0129286	down	1.55109	-1.55109	ENTPD1
hsa_gmr036726	0.00910865	down	1.55223	-1.55223	MMD
hsa_gmr008184	0.0488257	down	1.55237	-1.55237	ENTPD1
hsa_gmr088421	0.0484312	down	1.55239	-1.55239	FMNL3
hsa_gmr012255	0.00295044	down	1.55302	-1.55302	ESRRG
hsa_gmi055011	0.00234746	down	1.5532	-1.5532	ZNF689
hsa_gmr031927	0.0141723	down	1.55368	-1.55368	MGAT5
hsa_gmr099453	0.0469605	down	1.55374	-1.55374	SNCAIP
hsa_gmr093766	0.000413266	down	1.55385	-1.55385	LZIC
hsa_gmr108590	0.0172438	down	1.55407	-1.55407	SLC28A1
hsa_gmr087625	0.0210148	down	1.55457	-1.55457	PAPLN
hsa_gmr120236	0.0272388	down	1.55599	-1.55599	PECR
hsa_gmr038906	0.0181655	down	1.55641	-1.55641	IRX4
hsa_gmr102429	0.0314974	down	1.55659	-1.55659	RABEPK
hsa_gmr117202	0.0486174	down	1.55682	-1.55682	SLC38A6
hsa_gmr005081	0.0121697	down	1.55693	-1.55693	FOXP3
hsa_gmr083330	0.0036543	down	1.55722	-1.55722	LSM14B
hsa_gmr109606	0.0168647	down	1.55758	-1.55758	RBFOX3
hsa_gmr064276	0.00224195	down	1.55788	-1.55788	OSMR
hsa_gmi132457	0.0104255	down	1.55825	-1.55825	DHX33
hsa_gmr044975	0.033518	down	1.55904	-1.55904	MPIG6B
hsa_gmr043226	0.0449192	down	1.55926	-1.55926	NBPF3
hsa_gmr020274	0.000310903	down	1.5597	-1.5597	TXNIP
hsa_gmr097055	0.0168472	down	1.55983	-1.55983	C3orf14
hsa_gmr036999	0.000608645	down	1.55987	-1.55987	AK4
hsa_gmi131032	0.00650942	down	1.56016	-1.56016	SIX4
hsa_gmi139603	0.0105882	down	1.56124	-1.56124	DDX59
hsa_gmr111700	0.00586026	down	1.5614	-1.5614	PLIN4
hsa_gmr008635	0.019974	down	1.56179	-1.56179	LST1
hsa_gmr065681	0.0392517	down	1.56202	-1.56202	CGNL1
hsa_bmr047215	0.00252468	down	1.56211	-1.56211	LSM11
hsa_gmr087817	0.0220147	down	1.563	-1.563	SH2B3
hsa_gmr089426	2.86885e-06	down	1.5632	-1.5632	DDAH1
hsa_gmr022353	0.00817217	down	1.56388	-1.56388	GPAT2
hsa_gmi054859	0.0468235	down	1.56421	-1.56421	CNIH2
hsa_gmr015824	0.00461683	down	1.56456	-1.56456	SUSD1
hsa_bmr001053	0.0113279	down	1.56463	-1.56463	OR7G3
hsa_gmr080052	0.0109427	down	1.56464	-1.56464	CERS3
hsa_gmi133745	0.016009	down	1.56476	-1.56476	LOC107985416
hsa_gmr072945	0.0189476	down	1.56531	-1.56531	CHRNA3
hsa_gmr115216	0.00245489	down	1.56545	-1.56545	RABEPK
hsa_bmr048674	0.0108838	down	1.5656	-1.5656	AJUBA
hsa_gmr084398	0.00653834	down	1.56602	-1.56602	DACH2
hsa_gmr064435	0.0425599	down	1.56619	-1.56619	MTCH1
hsa_gmr043307	0.00025328	down	1.56623	-1.56623	PCGF5
hsa_gmr118801	0.00297083	down	1.56719	-1.56719	ZBTB14
hsa_bmr037709	0.00102892	down	1.56755	-1.56755	DHCR24
hsa_gmi060751	0.0255416	down	1.56869	-1.56869	L3HYPDH
hsa_gmr090377	0.00102788	down	1.56897	-1.56897	FSTL4
hsa_gmr065541	0.0152176	down	1.56925	-1.56925	DENND4A
hsa_gmr046115	0.0452732	down	1.56951	-1.56951	CLRN3
hsa_gmr014836	0.00134953	down	1.57008	-1.57008	FRS2
hsa_gmr045097	0.0425761	down	1.57025	-1.57025	MRAP2
hsa_gmr102232	0.000175941	down	1.57029	-1.57029	DOCK5
hsa_bmr001271	0.040899	down	1.57128	-1.57128	OR10AD1
hsa_gmr111322	0.0370513	down	1.57184	-1.57184	ZNF544
hsa_gmr113260	0.00155734	down	1.57244	-1.57244	CXorf38
hsa_bmr000683	0.04649	down	1.57244	-1.57244	CYP1A2
hsa_bmr084733	0.0362802	down	1.57265	-1.57265	PGRMC2
hsa_gmr008168	0.0115704	down	1.57296	-1.57296	VCAN
hsa_gmr091069	0.00018307	down	1.57328	-1.57328	DOCK5
hsa_gmr014202	0.00991438	down	1.57338	-1.57338	PEX11A
hsa_gmi059008	1.97652e-05	down	1.57358	-1.57358	IDI1
hsa_gmr094011	0.0241622	down	1.57428	-1.57428	PLCH2
hsa_gmr115766	9.22682e-06	down	1.57451	-1.57451	IDI1
hsa_gmr012731	0.00905576	down	1.57468	-1.57468	NABP1
hsa_gmi132365	0.0262602	down	1.57484	-1.57484	MMD
hsa_bmr021119	0.0249181	down	1.5751	-1.5751	MAJIN
hsa_gmr119707	0.00442103	down	1.57628	-1.57628	INTS6L
hsa_gmr034867	7.33334e-05	down	1.57648	-1.57648	NR2F1
hsa_gmi136143	0.0169225	down	1.57701	-1.57701	SH2B3
hsa_bmr078234	0.0499362	down	1.57719	-1.57719	C8orf34
hsa_gmr016178	7.28294e-05	down	1.5773	-1.5773	JKAMP
hsa_gmr039973	0.000209003	down	1.57749	-1.57749	CHST11
hsa_gmr098815	0.00667156	down	1.57769	-1.57769	FSTL4
hsa_gmr019941	0.0326528	down	1.57797	-1.57797	SNCAIP
hsa_gmi123044	0.013793	down	1.57857	-1.57857	FAM110C
hsa_gmr002986	0.0267839	down	1.57883	-1.57883	GALNTL6
hsa_gmr020674	4.38779e-05	down	1.57903	-1.57903	IDI1
hsa_gmr082967	0.0329048	down	1.57937	-1.57937	FAM129C
hsa_gmi128841	0.00138408	down	1.57943	-1.57943	RASSF4
hsa_gmr016280	2.95166e-05	down	1.57971	-1.57971	EIF3J
hsa_gmr009729	0.0207991	down	1.58068	-1.58068	ADGRG2
hsa_gmr108392	0.0323691	down	1.58075	-1.58075	PPCDC
hsa_gmr079554	0.0229927	down	1.58078	-1.58078	SMPD1
hsa_gmr067570	0.000179224	down	1.58079	-1.58079	LCLAT1
hsa_bmr080006	0.0412967	down	1.58202	-1.58202	TBC1D21
hsa_gmr046882	0.0145743	down	1.58214	-1.58214	RASGRP4
hsa_gmr005945	0.021424	down	1.58267	-1.58267	USP46
hsa_gmr114411	0.00283515	down	1.58297	-1.58297	CARMIL1
hsa_gmr069909	0.030952	down	1.58322	-1.58322	ATP2B3
hsa_gmr038550	0.021801	down	1.58367	-1.58367	STMN3
hsa_gmr090379	0.00198578	down	1.58405	-1.58405	FSTL4
hsa_bmr081329	0.0476181	down	1.5842	-1.5842	USP6
hsa_bmr088083	0.0278761	down	1.58436	-1.58436	MMAB
hsa_gmr096794	0.0241699	down	1.58493	-1.58493	SSUH2
hsa_gmr115767	5.95327e-05	down	1.58508	-1.58508	IDI1
hsa_gmr099248	0.000742783	down	1.58516	-1.58516	NR2F1
hsa_gmr118609	0.017129	down	1.58562	-1.58562	KIAA0040
hsa_gmr034155	0.00772635	down	1.58563	-1.58563	PTGES
hsa_gmr118600	0.0222177	down	1.58644	-1.58644	PLCH2
hsa_gmr118613	0.000966463	down	1.58671	-1.58671	KIAA0040
hsa_gmr071884	0.0241349	down	1.58675	-1.58675	FER1L6
hsa_gmr082274	0.0416264	down	1.58781	-1.58781	FHOD3
hsa_gmr111227	0.0191564	down	1.5884	-1.5884	FAM129C
hsa_gmi123157	0.039356	down	1.58865	-1.58865	SESTD1
hsa_gmi139438	0.00287645	down	1.58913	-1.58913	MMD
hsa_gmr011871	0.0397516	down	1.58955	-1.58955	LOC100130451
hsa_gmr100282	0.012697	down	1.58987	-1.58987	FAM135A
hsa_gmr067319	0.000328047	down	1.58996	-1.58996	MSMO1
hsa_gmr031883	0.00134979	down	1.59058	-1.59058	MXD1
hsa_gmr080075	0.0488794	down	1.59075	-1.59075	ACSBG1
hsa_gmr020185	0.00575503	down	1.59089	-1.59089	SHH
hsa_gmr042723	9.49218e-05	down	1.59132	-1.59132	SGPP1
hsa_gmr105621	0.0202622	down	1.59147	-1.59147	RAB3IP
hsa_bmr021422	0.00120545	down	1.59152	-1.59152	DCP1B
hsa_bmr044181	0.0275837	down	1.59169	-1.59169	MAS1L
hsa_gmr103027	0.00020433	down	1.5919	-1.5919	SUSD1
hsa_gmr011582	0.0489255	down	1.59195	-1.59195	AGER
hsa_gmr010885	9.60196e-05	down	1.59212	-1.59212	DHX33
hsa_gmi135405	0.0317001	down	1.59243	-1.59243	LMBR1
hsa_gmr016176	0.00157168	down	1.59252	-1.59252	JKAMP
hsa_bmr019192	0.0361193	down	1.59497	-1.59497	C6orf99
hsa_gmr070860	0.0449908	down	1.59592	-1.59592	STAB1
hsa_gmr090011	0.000480924	down	1.59604	-1.59604	ARHGAP42
hsa_gmr037998	0.00118776	down	1.59647	-1.59647	FSTL4
hsa_gmr016279	0.000231794	down	1.59654	-1.59654	EIF3J
hsa_gmr033351	0.00254019	down	1.59658	-1.59658	OSMR
hsa_gmr021983	0.0274835	down	1.59756	-1.59756	MAP3K8
hsa_gmr045633	0.00118843	down	1.59814	-1.59814	CXorf38
hsa_gmr066784	0.00589574	down	1.59833	-1.59833	PLAGL2
hsa_gmr101280	0.0431455	down	1.59839	-1.59839	PTPRZ1
hsa_gmr030695	0.00166686	down	1.59895	-1.59895	SPINK1
hsa_gmr075257	0.00655771	down	1.59931	-1.59931	MGAT5
hsa_gmi137063	0.0468676	down	1.5994	-1.5994	LYPD5
hsa_gmr120674	0.00853978	down	1.59955	-1.59955	FETUB
hsa_gmr090374	0.0150516	down	1.59961	-1.59961	SV2C
hsa_gmr019228	0.0110239	down	1.59981	-1.59981	PLCH2
hsa_bmr033037	0.00360122	down	1.59984	-1.59984	IFITM1
hsa_gmr089289	0.0423291	down	1.59993	-1.59993	SPAG17
hsa_gmi136033	0.000326182	down	1.60016	-1.60016	SMPD1
hsa_gmr012959	0.0175555	down	1.60076	-1.60076	NBPF3
hsa_bmr034374	0.00725104	down	1.6011	-1.6011	FGFBP1
hsa_gmr024276	0.00251641	down	1.60129	-1.60129	INIP
hsa_gmr017252	0.00119292	down	1.60147	-1.60147	FAM222B
hsa_gmi053140	0.0217809	down	1.60161	-1.60161	AGER
hsa_gmr001764	0.0437576	down	1.60245	-1.60245	NTRK3
hsa_gmr008963	0.0216325	down	1.60374	-1.60374	IGSF1
hsa_gmr011616	0.0181675	down	1.60387	-1.60387	AGER
hsa_gmr114552	0.000503838	down	1.60392	-1.60392	ZNF273
hsa_gmr078255	0.00454224	down	1.60512	-1.60512	XKR9
hsa_gmr068499	0.00432633	down	1.60599	-1.60599	ATP10A
hsa_gmi124068	0.0299957	down	1.60619	-1.60619	SSUH2
hsa_bmr090631	0.0418436	down	1.60633	-1.60633	PRAG1
hsa_bmr001344	0.0127289	down	1.60659	-1.60659	OR10J3
hsa_gmr087819	0.0212239	down	1.60794	-1.60794	SH2B3
hsa_gmr036112	0.0148973	down	1.6083	-1.6083	SPP2
hsa_gmr088204	0.0367919	down	1.60859	-1.60859	STAB2
hsa_gmr020415	9.94422e-05	down	1.60947	-1.60947	LZIC
hsa_bmr021373	0.03272	down	1.61032	-1.61032	GBP3
hsa_gmr073960	0.0274035	down	1.61081	-1.61081	ADGRG2
hsa_bmr090285	0.049512	down	1.61098	-1.61098	MARCH3
hsa_gmr031252	0.000287783	down	1.611	-1.611	RUNX1
hsa_gmr014630	0.013984	down	1.61233	-1.61233	CYP26B1
hsa_gmr019680	0.00678816	down	1.61338	-1.61338	TMEM170A
hsa_gmr120629	0.0231507	down	1.61346	-1.61346	TMCC1
hsa_gmr081090	0.00332493	down	1.61353	-1.61353	FASN
hsa_gmr029833	0.0383063	down	1.61369	-1.61369	CELF4
hsa_gmr014835	0.00303495	down	1.61489	-1.61489	FRS2
hsa_gmr103497	0.0102608	down	1.61587	-1.61587	MAP3K8
hsa_gmi132539	0.0286195	down	1.61756	-1.61756	TNS4
hsa_gmr066095	0.0470338	down	1.61769	-1.61769	GAS7
hsa_gmr019682	0.0024076	down	1.6178	-1.6178	TMEM170A
hsa_gmr007628	0.0104253	down	1.61789	-1.61789	MANSC4
hsa_gmi062665	0.0355001	down	1.61821	-1.61821	ZDHHC21
hsa_gmr022350	0.0465281	down	1.61831	-1.61831	ZNF845
hsa_gmr094013	0.00140386	down	1.61854	-1.61854	PLCH2
hsa_gmr044700	0.0389843	down	1.61947	-1.61947	OSCAR
hsa_gmr040741	4.58494e-05	down	1.61999	-1.61999	JPH1
hsa_gmi053865	3.9345e-06	down	1.6205	-1.6205	SOAT1
hsa_gmr016689	0.0299616	down	1.62089	-1.62089	KIAA0513
hsa_gmr064939	0.014147	down	1.62172	-1.62172	FAM110B
hsa_gmr024277	0.00977894	down	1.62241	-1.62241	INIP
hsa_gmr007116	0.0305653	down	1.62316	-1.62316	ITGA7
hsa_bmr036760	0.0437814	down	1.6232	-1.6232	OR8B8
hsa_gmr065428	0.0003311	down	1.6232	-1.6232	DUSP16
hsa_gmr088333	0.0337897	down	1.62352	-1.62352	PUS7L
hsa_gmr094012	0.0258148	down	1.62368	-1.62368	PLCH2
hsa_gmr108712	0.00450981	down	1.62374	-1.62374	TMEM170A
hsa_gmi127294	0.020226	down	1.62387	-1.62387	LOC646588
hsa_gmi058429	0.0211068	down	1.62435	-1.62435	MUC21
hsa_gmr081434	0.0162296	down	1.62468	-1.62468	AFMID
hsa_gmr118596	0.0492354	down	1.62487	-1.62487	PLCH2
hsa_gmr043304	9.75979e-05	down	1.62514	-1.62514	LZIC
hsa_gmr113807	0.0239819	down	1.62527	-1.62527	MAGED1
hsa_gmi136764	0.0173105	down	1.62545	-1.62545	B3GNTL1
hsa_gmr111059	0.0416935	down	1.62584	-1.62584	CEACAM4
hsa_gmr003852	0.0246293	down	1.62585	-1.62585	PEX2
hsa_gmr118615	0.0105393	down	1.62615	-1.62615	KIAA0040
hsa_gmr035765	0.0174393	down	1.62661	-1.62661	FRS2
hsa_gmi127624	0.0239967	down	1.62663	-1.62663	SPAG1
hsa_gmr042819	0.000612363	down	1.62665	-1.62665	C6orf62
hsa_gmr048268	0.00142278	down	1.62693	-1.62693	INTS6L
hsa_gmr038330	0.00553681	down	1.62731	-1.62731	CRELD1
hsa_gmr044701	0.0165072	down	1.62949	-1.62949	OSCAR
hsa_gmi144508	0.0165051	down	1.62968	-1.62968	C20orf173
hsa_gmr012629	7.10484e-06	down	1.62974	-1.62974	SOAT1
hsa_gmr047924	0.0373404	down	1.6299	-1.6299	ANO4
hsa_gmr020675	0.000547967	down	1.63029	-1.63029	IDI1
hsa_gmr102233	0.000656397	down	1.63102	-1.63102	DOCK5
hsa_gmr075408	0.0261491	down	1.63117	-1.63117	DNAH7
hsa_gmr090378	0.00094981	down	1.63148	-1.63148	FSTL4
hsa_bmr078447	0.0123882	down	1.63191	-1.63191	CBWD1
hsa_gmr108714	0.000790247	down	1.63265	-1.63265	TMEM170A
hsa_gmr084015	0.00875559	down	1.63331	-1.63331	HIC2
hsa_gmr080581	0.0061554	down	1.63373	-1.63373	ERCC4
hsa_gmr024875	0.0341956	down	1.63396	-1.63396	RPS6KA6
hsa_gmr025820	0.0229922	down	1.63465	-1.63465	PDGFRA
hsa_gmr113808	0.019199	down	1.63595	-1.63595	MAGED1
hsa_gmr047255	0.000291628	down	1.63652	-1.63652	FAM129C
hsa_gmr011119	0.000323737	down	1.63742	-1.63742	MXD1
hsa_gmr095898	0.00895193	down	1.63794	-1.63794	ARHGAP25
hsa_bmr032540	0.0120738	down	1.6387	-1.6387	SLN
hsa_gmi147314	0.000228604	down	1.63957	-1.63957	SLC38A2
hsa_gmr102426	0.0141297	down	1.64048	-1.64048	RABEPK
hsa_gmr037590	0.00239758	down	1.64059	-1.64059	PLCH2
hsa_gmr044270	0.0222903	down	1.64138	-1.64138	CYP3A43
hsa_gmr003847	0.00765098	down	1.64139	-1.64139	ADGRG2
hsa_gmr014816	0.00127822	down	1.64177	-1.64177	LILRA1
hsa_bmr070562	0.0390736	down	1.64209	-1.64209	DPY30
hsa_gmi060609	0.00286482	down	1.64275	-1.64275	INIP
hsa_gmr120481	0.0330543	down	1.64355	-1.64355	TP53I3
hsa_gmr083715	2.79888e-05	down	1.64401	-1.64401	MGME1
hsa_bmr106036	0.00011609	down	1.64471	-1.64471	MVK
hsa_gmr117200	0.0219996	down	1.64503	-1.64503	SLC38A6
hsa_gmr097811	0.0143483	down	1.64514	-1.64514	ZNF718
hsa_gmr009421	0.00155553	down	1.647	-1.647	SLC16A6
hsa_gmr105305	0.00866827	down	1.6483	-1.6483	JHY
hsa_gmr113979	0.0238594	down	1.64907	-1.64907	PKD2L2
hsa_bmr034743	0.0471183	down	1.65011	-1.65011	HSPA1L
hsa_gmr034948	0.00588209	down	1.65161	-1.65161	ADGRG2
hsa_gmr099255	0.0499679	down	1.65213	-1.65213	CCDC192
hsa_gmr029033	0.0105393	down	1.6524	-1.6524	CARF
hsa_bmr076347	0.000690582	down	1.65258	-1.65258	TLR6
hsa_gmr001820	0.000789349	down	1.65301	-1.65301	SMPD1
hsa_gmr074794	0.023664	down	1.65313	-1.65313	MYT1L
hsa_gmr024281	0.00574796	down	1.65317	-1.65317	INIP
hsa_gmr081954	0.0023689	down	1.65361	-1.65361	SLC16A6
hsa_gmi058611	0.0409147	down	1.65369	-1.65369	GPX8
hsa_gmr074579	0.000113402	down	1.65484	-1.65484	SOAT1
hsa_gmr078865	0.00999441	down	1.65628	-1.65628	SUSD1
hsa_gmr005386	0.000222331	down	1.65661	-1.65661	SPRY4
hsa_gmr075721	0.0457513	down	1.65761	-1.65761	CD28
hsa_gmr088848	0.0287058	down	1.65792	-1.65792	STAMBPL1
hsa_gmr019937	0.0345956	down	1.65822	-1.65822	SNCAIP
hsa_gmr012630	1.11404e-06	down	1.65838	-1.65838	SOAT1
hsa_gmr024280	0.00148507	down	1.65862	-1.65862	INIP
hsa_bmr099549	0.0448355	down	1.65862	-1.65862	FRS3
hsa_gmr079106	0.032884	down	1.65867	-1.65867	CREM
hsa_gmr020005	0.0126813	down	1.65888	-1.65888	CPEB4
hsa_gmr099320	0.00630558	down	1.6602	-1.6602	ELOVL7
hsa_gmr070859	0.0418476	down	1.66024	-1.66024	RAD54L2
hsa_gmr048277	0.0463729	down	1.6603	-1.6603	CNIH2
hsa_gmr063420	0.016884	down	1.66138	-1.66138	PPOX
hsa_gmr007382	0.00663475	down	1.66147	-1.66147	ZSCAN18
hsa_gmr090232	0.00127235	down	1.66164	-1.66164	UBASH3B
hsa_gmr047029	0.0320091	down	1.6619	-1.6619	AGER
hsa_gmr023010	0.0345807	down	1.66369	-1.66369	MUC21
hsa_bmr034631	0.00371331	down	1.66617	-1.66617	CCDC6
hsa_gmr019226	0.0140641	down	1.66686	-1.66686	PLCH2
hsa_bmr104996	0.0155352	down	1.66829	-1.66829	PC
hsa_gmr075472	0.000567127	down	1.66854	-1.66854	RAPH1
hsa_gmr013913	0.0423614	down	1.66891	-1.66891	RASSF6
hsa_gmr003037	0.00282876	down	1.66893	-1.66893	ZNF829
hsa_gmr108553	0.00122817	down	1.67039	-1.67039	CGNL1
hsa_gmr019938	0.0389791	down	1.67062	-1.67062	SNCAIP
hsa_gmr032567	2.86785e-05	down	1.67082	-1.67082	SOAT1
hsa_gmr064928	0.00752677	down	1.67108	-1.67108	JPH1
hsa_gmr007616	0.0353551	down	1.67157	-1.67157	RASGRP4
hsa_gmr065186	0.00194034	down	1.67201	-1.67201	PIP5K1B
hsa_gmr106456	0.0392598	down	1.67243	-1.67243	SOX5
hsa_gmr105580	0.0148596	down	1.67244	-1.67244	FRS2
hsa_gmr015086	0.0112223	down	1.67264	-1.67264	NFATC1
hsa_gmr099011	0.0429828	down	1.67315	-1.67315	MEF2C
hsa_gmr044713	0.0313108	down	1.67329	-1.67329	OSCAR
hsa_gmr065512	0.0419572	down	1.67556	-1.67556	BICDL1
hsa_gmr090411	0.000665746	down	1.67591	-1.67591	RGMB
hsa_gmr041115	0.000857732	down	1.67608	-1.67608	PSAT1
hsa_gmr019229	0.00354084	down	1.6764	-1.6764	PLCH2
hsa_gmr011791	0.0402945	down	1.67741	-1.67741	SYTL3
hsa_gmr005791	0.0112167	down	1.67806	-1.67806	ERICH4
hsa_gmr042640	0.0125397	down	1.67862	-1.67862	CPEB4
hsa_bmr089833	0.00588978	down	1.67925	-1.67925	LRP8
hsa_gmr024401	0.0182573	down	1.6794	-1.6794	GPX3
hsa_gmr021404	0.000153491	down	1.67946	-1.67946	KIAA0040
hsa_gmr033796	0.00018115	down	1.68013	-1.68013	IDI1
hsa_gmr033991	0.000731337	down	1.68035	-1.68035	SLC16A6
hsa_gmr090412	0.00880051	down	1.68107	-1.68107	RGMB
hsa_gmr098939	0.00163009	down	1.68155	-1.68155	RGMB
hsa_gmr100934	0.00480138	down	1.6816	-1.6816	C7orf71
hsa_gmi121986	0.00028033	down	1.68265	-1.68265	ZC3H12A
hsa_gmr119739	0.0275192	down	1.68282	-1.68282	ATP2B3
hsa_gmr066486	0.0065645	down	1.68292	-1.68292	TMEM145
hsa_gmr009884	0.00554207	down	1.68364	-1.68364	GNE
hsa_bmr088082	0.00687121	down	1.68454	-1.68454	MMAB
hsa_gmr033382	0.0411183	down	1.68499	-1.68499	ARSF
hsa_gmr011599	0.0230153	down	1.68512	-1.68512	AGER
hsa_gmr118614	0.000915263	down	1.68522	-1.68522	KIAA0040
hsa_gmi147207	0.0469393	down	1.68539	-1.68539	LOC105370691
hsa_bmr073388	0.0392874	down	1.68557	-1.68557	TEFM
hsa_bmr029586	0.0192141	down	1.68566	-1.68566	GPR137C
hsa_gmr114550	0.0291469	down	1.68645	-1.68645	ZNF273
hsa_gmr008785	0.00122726	down	1.68653	-1.68653	UGT3A2
hsa_bmi051607	0.0315138	down	1.68707	-1.68707	SMAD6
hsa_gmr023483	0.00174743	down	1.68736	-1.68736	ZC3H12A
hsa_gmr096796	0.00786122	down	1.6874	-1.6874	SSUH2
hsa_gmr064369	0.0101154	down	1.68876	-1.68876	ADGRB3
hsa_gmr118594	0.00120583	down	1.68892	-1.68892	PLCH2
hsa_gmr069388	0.0467522	down	1.68979	-1.68979	SEMA6A
hsa_gmr015386	0.0417432	down	1.69044	-1.69044	KIR2DS4
hsa_gmr032649	0.0136836	down	1.69207	-1.69207	TAL1
hsa_gmr002209	0.00576215	down	1.69242	-1.69242	RGMB
hsa_gmr068008	0.00288556	down	1.69346	-1.69346	CPEB4
hsa_gmr105303	0.00486982	down	1.69522	-1.69522	JHY
hsa_gmr042379	1.39256e-05	down	1.69561	-1.69561	DOCK5
hsa_gmr047049	0.0147422	down	1.69597	-1.69597	CSF1
hsa_gmr065669	0.0176473	down	1.69649	-1.69649	SEMA6D
hsa_gmr073760	0.000114984	down	1.69724	-1.69724	MGME1
hsa_gmr035218	0.0399201	down	1.69821	-1.69821	SIRPB1
hsa_gmr038336	0.0346531	down	1.69944	-1.69944	MAGI1
hsa_gmr100200	0.000694731	down	1.69963	-1.69963	CARMIL1
hsa_bmr010989	0.0314142	down	1.69991	-1.69991	NDUFS1
hsa_gmr024278	0.00163817	down	1.69996	-1.69996	INIP
hsa_gmr018377	0.000882049	down	1.70019	-1.70019	SPRY4
hsa_bmr000084	0.0110934	down	1.70029	-1.70029	CYP17A1
hsa_gmr017256	0.000249599	down	1.70095	-1.70095	FAM222B
hsa_gmr118561	0.000306346	down	1.70186	-1.70186	SLC16A6
hsa_gmr044166	0.0307441	down	1.70222	-1.70222	C8orf34
hsa_gmr039059	0.00283225	down	1.70381	-1.70381	SLC15A3
hsa_gmr102427	0.00193053	down	1.70528	-1.70528	RABEPK
hsa_gmr119927	0.0226517	down	1.7054	-1.7054	LOC107984449
hsa_gmr023484	0.00119022	down	1.70547	-1.70547	ZC3H12A
hsa_gmr018378	0.000287011	down	1.7055	-1.7055	SPRY4
hsa_gmr066883	0.000597221	down	1.70576	-1.70576	MGME1
hsa_gmr017861	0.00230978	down	1.70669	-1.70669	C19orf48
hsa_gmr101938	0.038431	down	1.70671	-1.70671	XKR5
hsa_gmr103494	0.00751702	down	1.7078	-1.7078	MAP3K8
hsa_gmr074226	0.0306482	down	1.70793	-1.70793	ESRRG
hsa_gmr035238	0.00116442	down	1.70808	-1.70808	CORO2B
hsa_gmr037613	0.00281203	down	1.71015	-1.71015	KIAA0040
hsa_gmr113318	0.00125224	down	1.71034	-1.71034	BRWD3
hsa_gmr116595	0.0176946	down	1.71185	-1.71185	C12orf50
hsa_gmi058621	0.030939	down	1.71299	-1.71299	SNCAIP
hsa_gmr042440	0.000489158	down	1.71306	-1.71306	ZC3H12A
hsa_gmr023113	0.00460445	down	1.71346	-1.71346	HPS1
hsa_gmr095775	0.0282651	down	1.7157	-1.7157	SESTD1
hsa_gmr012881	0.00606677	down	1.71686	-1.71686	VSX1
hsa_gmr089430	0.0267117	down	1.71689	-1.71689	TTLL10
hsa_gmr025186	0.0124891	down	1.71696	-1.71696	L3HYPDH
hsa_gmr017250	0.00130225	down	1.71732	-1.71732	FAM222B
hsa_gmr089199	0.0293868	down	1.71755	-1.71755	COL9A2
hsa_gmr112413	0.00172582	down	1.7178	-1.7178	MGME1
hsa_gmr021740	0.0252759	down	1.71884	-1.71884	ADD3
hsa_gmr078200	0.0121361	down	1.71894	-1.71894	NCALD
hsa_bmr084088	0.0433392	down	1.71928	-1.71928	INPP5J
hsa_gmr087805	0.000962557	down	1.71938	-1.71938	SPRY4
hsa_gmr094014	0.00244445	down	1.72009	-1.72009	PLCH2
hsa_gmr066316	5.63497e-05	down	1.72055	-1.72055	SLC16A6
hsa_gmi062412	0.012099	down	1.72075	-1.72075	TPRA1
hsa_gmr012254	0.0035031	down	1.7211	-1.7211	ESRRG
hsa_gmr020673	3.91582e-05	down	1.72113	-1.72113	IDI1
hsa_bmr082332	0.0278843	down	1.72223	-1.72223	LOC105372109
hsa_gmi139420	0.00125575	down	1.72226	-1.72226	NOD2
hsa_gmi059257	0.00174045	down	1.72267	-1.72267	LYRM4
hsa_gmr018721	0.0203499	down	1.72287	-1.72287	BATF2
hsa_gmr118608	0.000123009	down	1.72338	-1.72338	KIAA0040
hsa_gmr022284	0.00156789	down	1.72386	-1.72386	HEATR9
hsa_gmr044299	9.61822e-08	down	1.7251	-1.7251	PSAT1
hsa_gmi055096	0.0143194	down	1.72512	-1.72512	STMN3
hsa_gmr110586	0.038889	down	1.72577	-1.72577	ZBTB7C
hsa_bmr000853	0.000655679	down	1.72634	-1.72634	PTGER2
hsa_gmr019227	0.0114587	down	1.72708	-1.72708	PLCH2
hsa_gmr034792	0.0485831	down	1.72774	-1.72774	CD180
hsa_gmr012521	0.0201581	down	1.72811	-1.72811	VIPR1
hsa_gmr107472	0.0412818	down	1.73027	-1.73027	GCH1
hsa_gmr094906	0.044076	down	1.73039	-1.73039	MFSD2B
hsa_gmr011369	0.0455767	down	1.73102	-1.73102	KCNH2
hsa_gmr066920	0.000235903	down	1.73108	-1.73108	RUNX1
hsa_gmr044634	0.0119765	down	1.73129	-1.73129	OSCAR
hsa_gmr110357	0.000231093	down	1.73241	-1.73241	SLC16A6
hsa_gmr042285	0.013136	down	1.73359	-1.73359	JHY
hsa_gmr118616	0.000391306	down	1.73534	-1.73534	KIAA0040
hsa_gmr109882	0.0110286	down	1.73585	-1.73585	SLFN14
hsa_gmi128790	0.00794116	down	1.73628	-1.73628	CXCL12
hsa_gmr115146	0.000226463	down	1.73684	-1.73684	DOCK5
hsa_gmr064527	0.0292983	down	1.7369	-1.7369	MLIP
hsa_gmr099282	0.0478062	down	1.73767	-1.73767	CCNJL
hsa_gmr094752	0.0172939	down	1.73783	-1.73783	ERICH2
hsa_gmi140447	0.00796602	down	1.73918	-1.73918	ATP13A4
hsa_bmr085098	0.0027924	down	1.73992	-1.73992	SHROOM3
hsa_gmr099154	0.00588141	down	1.74018	-1.74018	SEMA6A
hsa_gmr001313	0.0202622	down	1.74273	-1.74273	MTHFD2L
hsa_gmr093834	0.0212676	down	1.74286	-1.74286	ITGA10
hsa_gmr089869	0.000159819	down	1.74354	-1.74354	ZC3H12A
hsa_gmr045925	0.0265193	down	1.74382	-1.74382	RBFOX1
hsa_gmr109406	0.0205285	down	1.74444	-1.74444	LOC107984859
hsa_gmi058877	0.0337186	down	1.74476	-1.74476	PLA2G10
hsa_gmi061794	0.00836839	down	1.74495	-1.74495	KHDRBS2
hsa_gmr036700	0.0310288	down	1.74553	-1.74553	KIR2DS4
hsa_gmr034220	0.0214032	down	1.74587	-1.74587	ETV1
hsa_bmr037432	0.00534703	down	1.74594	-1.74594	LSM3
hsa_gmr014838	0.0092752	down	1.74684	-1.74684	FRS2
hsa_gmr000294	0.0432912	down	1.74714	-1.74714	SCN5A
hsa_bmr094360	0.0477625	down	1.7473	-1.7473	CIB4
hsa_gmr006668	0.0268898	down	1.74961	-1.74961	ABCG4
hsa_gmr112663	0.000837474	down	1.75009	-1.75009	RUNX1
hsa_gmi054929	0.0145797	down	1.75119	-1.75119	HRK
hsa_bmr043277	0.0371058	down	1.75139	-1.75139	CAPNS2
hsa_gmr069371	0.00178317	down	1.75167	-1.75167	RGMB
hsa_gmr097607	0.00870494	down	1.7517	-1.7517	PABPC4L
hsa_gmr118925	0.0100405	down	1.75178	-1.75178	ZNF320
hsa_gmr005914	0.00388245	down	1.75209	-1.75209	HMGCR
hsa_gmr100205	0.00189144	down	1.75218	-1.75218	CARMIL1
hsa_gmr080530	0.0372427	down	1.75454	-1.75454	HOMER2
hsa_gmr003845	0.0330042	down	1.75488	-1.75488	ADGRG2
hsa_gmr119304	0.00353083	down	1.75519	-1.75519	C20orf203
hsa_gmr070259	0.0307211	down	1.75631	-1.75631	CR1
hsa_gmr045410	0.0324163	down	1.75677	-1.75677	C1orf105
hsa_bmr001538	0.0441273	down	1.75698	-1.75698	OR4A16
hsa_gmr011928	0.036459	down	1.75756	-1.75756	LOC100506388
hsa_gmr022865	0.0114956	down	1.75823	-1.75823	DCT
hsa_gmr102234	0.000469551	down	1.75874	-1.75874	DOCK5
hsa_gmr035895	0.000444048	down	1.75883	-1.75883	MSMO1
hsa_gmr083904	0.00032076	down	1.76303	-1.76303	RUNX1
hsa_gmr118910	0.0115077	down	1.764	-1.764	ZNF583
hsa_gmr064483	0.00370194	down	1.76416	-1.76416	CARMIL1
hsa_gmr046790	0.00349711	down	1.76499	-1.76499	SEMA6D
hsa_gmr089834	0.00987338	down	1.767	-1.767	LAPTM5
hsa_gmr104989	0.0228977	down	1.76767	-1.76767	NTM
hsa_gmr099341	0.000314608	down	1.76771	-1.76771	SPRY4
hsa_gmr111633	0.0316771	down	1.76872	-1.76872	ZNF350
hsa_gmr100199	0.00266465	down	1.76915	-1.76915	CARMIL1
hsa_gmr112435	0.0280869	down	1.76972	-1.76972	RASSF2
hsa_gmr009414	0.000298377	down	1.76977	-1.76977	RABEPK
hsa_gmr105300	0.0144859	down	1.77029	-1.77029	JHY
hsa_gmi146347	0.00425308	down	1.77098	-1.77098	TEX26
hsa_gmr008697	0.0433205	down	1.77139	-1.77139	CADM2
hsa_bmr086682	0.0189563	down	1.7716	-1.7716	PACRG
hsa_gmr100206	0.00756385	down	1.77231	-1.77231	CARMIL1
hsa_gmr093465	0.0273841	down	1.7738	-1.7738	SYCP1
hsa_gmr086059	0.000703116	down	1.77419	-1.77419	CRELD1
hsa_gmr088572	0.0473066	down	1.77482	-1.77482	C10orf82
hsa_gmr110072	0.0033033	down	1.77518	-1.77518	DHX33
hsa_gmr106232	0.0375451	down	1.77835	-1.77835	STAB2
hsa_gmr098940	0.00199852	down	1.77939	-1.77939	RGMB
hsa_gmr020184	0.00492019	down	1.77945	-1.77945	MGME1
hsa_gmr002392	0.00131449	down	1.78034	-1.78034	MSMO1
hsa_gmr100913	0.0495685	down	1.78088	-1.78088	TPK1
hsa_gmr015378	0.0374098	down	1.7809	-1.7809	KIR2DS4
hsa_gmr091071	0.000461831	down	1.78099	-1.78099	DOCK5
hsa_gmr115255	0.0271546	down	1.7818	-1.7818	TTC39B
hsa_gmr008045	0.000370362	down	1.78217	-1.78217	KIAA0040
hsa_gmi145654	0.0410751	down	1.78283	-1.78283	ATOH8
hsa_gmr069301	0.0205168	down	1.78411	-1.78411	JHY
hsa_gmr047806	0.0308209	down	1.78471	-1.78471	CCDC36
hsa_gmr036021	0.02644	down	1.78716	-1.78716	LILRA1
hsa_gmr034429	0.040504	down	1.78723	-1.78723	MAP3K8
hsa_gmr043620	0.00145859	down	1.78825	-1.78825	UBASH3B
hsa_gmr044235	0.0182129	down	1.78834	-1.78834	DACH2
hsa_gmr009886	0.000978206	down	1.78894	-1.78894	GNE
hsa_gmr110358	2.63729e-06	down	1.78926	-1.78926	SLC16A6
hsa_gmr015578	0.0153925	down	1.79034	-1.79034	OSCAR
hsa_gmr093607	0.0138799	down	1.79044	-1.79044	TTLL7
hsa_gmr118595	0.0109424	down	1.79148	-1.79148	PLCH2
hsa_gmr041195	0.0194602	down	1.79154	-1.79154	OPRPN
hsa_gmr112412	0.00145747	down	1.79181	-1.79181	MGME1
hsa_gmr063989	0.0212644	down	1.7923	-1.7923	MORC1
hsa_gmr036705	0.0408292	down	1.79249	-1.79249	KIR2DS4
hsa_gmr099319	0.00223104	down	1.79292	-1.79292	ELOVL7
hsa_gmr066523	0.00923674	down	1.79306	-1.79306	POU2F2
hsa_gmr042574	0.00337617	down	1.79394	-1.79394	SLC44A4
hsa_gmr005015	0.0451896	down	1.79466	-1.79466	RGS4
hsa_gmr048642	0.0344848	down	1.79489	-1.79489	BOLL
hsa_bmi055586	0.0407362	down	1.79495	-1.79495	LILRA6
hsa_gmr083716	0.000130287	down	1.79498	-1.79498	MGME1
hsa_gmr102418	0.000889585	down	1.79516	-1.79516	GNE
hsa_gmr014834	0.0340881	down	1.79563	-1.79563	FRS2
hsa_gmr113777	0.000285006	down	1.79569	-1.79569	HS6ST2
hsa_gmr048086	0.0432935	down	1.79595	-1.79595	MFSD4A
hsa_gmr034674	0.007693	down	1.79735	-1.79735	GNE
hsa_bmr044177	0.0467589	down	1.79798	-1.79798	MAS1L
hsa_gmr083956	0.0317685	down	1.79859	-1.79859	CRYBB3
hsa_gmr120323	0.0434494	down	1.80068	-1.80068	TPO
hsa_gmr117844	0.0260765	down	1.80137	-1.80137	ZNF778
hsa_gmr036023	0.0326809	down	1.80243	-1.80243	LILRA1
hsa_gmr044710	0.0490539	down	1.80297	-1.80297	OSCAR
hsa_gmi132382	0.00364419	down	1.8049	-1.8049	HID1
hsa_gmi133285	0.0140097	down	1.80556	-1.80556	POU2F2
hsa_gmr092271	0.0440888	down	1.80623	-1.80623	EPB41
hsa_gmr115661	0.0163042	down	1.80729	-1.80729	PLPP4
hsa_gmr042850	0.000392647	down	1.80784	-1.80784	SPRY4
hsa_gmr039309	0.000107255	down	1.80806	-1.80806	CARMIL1
hsa_gmr105301	0.00747322	down	1.80864	-1.80864	JHY
hsa_gmr008947	0.0128324	down	1.80907	-1.80907	BACH2
hsa_gmr105581	0.00134594	down	1.80991	-1.80991	FRS2
hsa_bmi121889	0.0168225	down	1.81137	-1.81137	PSEN2
hsa_bmr046204	0.0363743	down	1.81139	-1.81139	ZNF572
hsa_gmr045207	0.00466055	down	1.81279	-1.81279	TRIM40
hsa_gmr083906	0.0017982	down	1.81369	-1.81369	RUNX1
hsa_gmr020513	0.00968124	down	1.8138	-1.8138	BRINP3
hsa_gmr088425	0.0398229	down	1.81506	-1.81506	FMNL3
hsa_gmr092308	0.0147731	down	1.81745	-1.81745	ESRRG
hsa_gmr048721	0.0237383	down	1.81996	-1.81996	OASL
hsa_gmr007384	0.000689061	down	1.82069	-1.82069	ZSCAN18
hsa_gmr036148	0.0206938	down	1.82097	-1.82097	RPH3AL
hsa_gmr075951	0.0195354	down	1.82154	-1.82154	FETUB
hsa_gmr107391	0.00202876	down	1.82171	-1.82171	FKBP3
hsa_gmr086627	0.0336788	down	1.82267	-1.82267	MTRF1
hsa_gmi062648	0.0493807	down	1.82271	-1.82271	PIAS2
hsa_gmr003749	0.000558173	down	1.82444	-1.82444	FAM222B
hsa_gmr090418	0.000378244	down	1.82571	-1.82571	HMGCR
hsa_gmr031590	0.0234356	down	1.82718	-1.82718	HAL
hsa_gmr081134	0.048931	down	1.82784	-1.82784	KRBA2
hsa_gmr020183	0.000105973	down	1.82859	-1.82859	MGME1
hsa_gmr083048	0.0424365	down	1.82934	-1.82934	CPAMD8
hsa_bmr034656	0.0216747	down	1.82954	-1.82954	CER1
hsa_gmr017257	1.6081e-05	down	1.83026	-1.83026	FAM222B
hsa_gmr092745	0.0450366	down	1.83041	-1.83041	SPATA21
hsa_gmi145979	0.020428	down	1.83112	-1.83112	VIPR1
hsa_gmr075382	0.0430984	down	1.83289	-1.83289	KANSL3
hsa_gmi124067	0.0147828	down	1.83398	-1.83398	SSUH2
hsa_bmr117322	0.0315523	down	1.83613	-1.83613	COQ6
hsa_gmi125672	0.0333595	down	1.83716	-1.83716	SNCAIP
hsa_gmi149180	0.0265507	down	1.84011	-1.84011	PITPNM1
hsa_gmr017258	0.0127845	down	1.84026	-1.84026	FAM222B
hsa_gmr003668	0.00259997	down	1.84333	-1.84333	HS6ST2
hsa_gmi051788	0.0195483	down	1.84428	-1.84428	DCAF8
hsa_bmr099287	0.0061287	down	1.84438	-1.84438	ANKRD55
hsa_bmr076745	0.0257549	down	1.84465	-1.84465	TCTE1
hsa_gmr026099	0.0320407	down	1.84471	-1.84471	SERPINB13
hsa_gmi141486	0.0393891	down	1.84729	-1.84729	MGAM2
hsa_gmr021405	0.00105714	down	1.84767	-1.84767	KIAA0040
hsa_bmi144068	0.0344171	down	1.84921	-1.84921	BCL2
hsa_gmr023254	0.0234153	down	1.84928	-1.84928	FKBP1B
hsa_gmr098898	0.00598778	down	1.84928	-1.84928	PKD2L2
hsa_gmr012253	0.0410672	down	1.85025	-1.85025	ESRRG
hsa_gmr072502	0.0305496	down	1.85125	-1.85125	JHY
hsa_gmr043916	0.046432	down	1.85126	-1.85126	SIGLEC12
hsa_gmr003846	0.00353441	down	1.85403	-1.85403	ADGRG2
hsa_gmr102428	0.00325993	down	1.85578	-1.85578	RABEPK
hsa_gmi131131	0.0206464	down	1.85633	-1.85633	REC8
hsa_gmr109883	0.0260161	down	1.85652	-1.85652	SLFN14
hsa_gmr108415	0.0385277	down	1.85712	-1.85712	SH2D7
hsa_gmr077144	0.0355747	down	1.8573	-1.8573	NOD1
hsa_gmr031570	0.012439	down	1.85798	-1.85798	GPX3
hsa_gmr092077	0.0398705	down	1.85807	-1.85807	OR6N1
hsa_gmr068754	0.00201829	down	1.8583	-1.8583	FMNL3
hsa_gmr034180	0.033815	down	1.85857	-1.85857	PITPNM1
hsa_gmr109130	0.0471409	down	1.85899	-1.85899	NMRAL1
hsa_gmr079296	0.0106182	down	1.86159	-1.86159	AKR1E2
hsa_gmr041126	0.0494233	down	1.86224	-1.86224	ABHD16A
hsa_gmr082205	0.0218699	down	1.86354	-1.86354	SERPINB13
hsa_gmr100201	0.00076819	down	1.86468	-1.86468	CARMIL1
hsa_gmi129486	0.0349645	down	1.86516	-1.86516	PITPNM1
hsa_gmr079524	0.0126777	down	1.86524	-1.86524	LRRC4C
hsa_gmr013824	0.0321261	down	1.86525	-1.86525	ARPP21
hsa_gmr049533	0.00699651	down	1.86845	-1.86845	OSCAR
hsa_gmi060657	0.0477063	down	1.87007	-1.87007	HKR1
hsa_gmr095828	0.0401499	down	1.87048	-1.87048	OTOF
hsa_gmr008047	0.000147284	down	1.87096	-1.87096	KIAA0040
hsa_gmr083484	0.000626372	down	1.87308	-1.87308	ACSS2
hsa_gmr067920	0.0228309	down	1.8764	-1.8764	MTHFD2L
hsa_gmr116331	0.0268119	down	1.87787	-1.87787	NTM
hsa_bmr040448	0.0293843	down	1.87806	-1.87806	HLA-DQA2
hsa_gmr017254	0.00160588	down	1.8791	-1.8791	FAM222B
hsa_gmr003512	0.013046	down	1.87933	-1.87933	FRS2
hsa_gmr017255	0.000137529	down	1.88011	-1.88011	FAM222B
hsa_gmr047363	0.0362006	down	1.88175	-1.88175	PDZD9
hsa_gmr005438	0.0398769	down	1.8822	-1.8822	SERPINA1
hsa_gmr069770	0.0434801	down	1.88372	-1.88372	SYTL2
hsa_gmr082142	0.00729117	down	1.8839	-1.8839	PIGN
hsa_gmi055012	0.0125028	down	1.88409	-1.88409	ZNF689
hsa_gmr114412	0.000284219	down	1.88461	-1.88461	CARMIL1
hsa_gmr121497	0.0467323	down	1.88499	-1.88499	IQCM
hsa_gmr090566	0.00109752	down	1.88554	-1.88554	ELOVL7
hsa_gmr114434	0.00487354	down	1.88759	-1.88759	BACH2
hsa_bmr035573	0.0399855	down	1.88849	-1.88849	SLCO1B1
hsa_gmr063475	0.000826342	down	1.88864	-1.88864	NUAK2
hsa_gmr085586	0.0464086	down	1.88903	-1.88903	CAPN13
hsa_gmr095876	0.0247657	down	1.88969	-1.88969	HDAC4
hsa_gmr032190	0.0120308	down	1.89445	-1.89445	POU2F2
hsa_gmr018512	0.000936739	down	1.89568	-1.89568	ELOVL7
hsa_gmr013756	0.00654117	down	1.89578	-1.89578	SLC7A8
hsa_gmi128074	0.006863	down	1.89753	-1.89753	FREM1
hsa_gmr105302	0.0205583	down	1.90171	-1.90171	JHY
hsa_gmr042375	0.00105541	down	1.90182	-1.90182	ELOVL7
hsa_gmr011771	0.00537946	down	1.90187	-1.90187	MAP3K13
hsa_gmr000766	2.43242e-05	down	1.90334	-1.90334	HMGCR
hsa_gmr034111	0.035674	down	1.90349	-1.90349	KCNK6
hsa_gmr064323	0.00770092	down	1.90362	-1.90362	ELOVL7
hsa_gmr066831	0.0221657	down	1.9075	-1.9075	SIRPB1
hsa_gmr019764	0.0149748	down	1.90915	-1.90915	CYREN
hsa_gmr100202	0.00341126	down	1.90946	-1.90946	CARMIL1
hsa_gmr105489	0.0318715	down	1.91103	-1.91103	PITPNM1
hsa_gmr036277	0.0316527	down	1.91142	-1.91142	ZNF135
hsa_gmr005102	0.00390884	down	1.91217	-1.91217	PABPC4L
hsa_gmr066789	0.000461148	down	1.91324	-1.91324	ACSS2
hsa_gmr014837	0.00917994	down	1.91389	-1.91389	FRS2
hsa_bmr001029	0.00648228	down	1.9144	-1.9144	OR2G3
hsa_gmr109885	0.0472794	down	1.91509	-1.91509	SLFN14
hsa_gmr091070	0.0016716	down	1.91513	-1.91513	DOCK5
hsa_gmr083483	3.6666e-05	down	1.91819	-1.91819	ACSS2
hsa_gmr046796	0.0300278	down	1.91869	-1.91869	CPNE9
hsa_gmr069305	1.9399e-05	down	1.91873	-1.91873	UBASH3B
hsa_gmr064322	0.00906503	down	1.92008	-1.92008	ELOVL7
hsa_gmr111630	0.0251642	down	1.92044	-1.92044	ZNF350
hsa_gmr023455	0.0203784	down	1.92079	-1.92079	OSMR
hsa_gmr086858	0.0299674	down	1.92199	-1.92199	KPNA5
hsa_gmr033185	0.015061	down	1.92204	-1.92204	HRK
hsa_gmi132349	0.0308844	down	1.92452	-1.92452	SLC47A2
hsa_gmr012606	3.13797e-05	down	1.92564	-1.92564	FAM69A
hsa_gmr116909	0.0432054	down	1.92576	-1.92576	BCL2L14
hsa_gmr081723	0.000723045	down	1.92853	-1.92853	FAM222B
hsa_gmi053891	0.012646	down	1.92896	-1.92896	KIN
hsa_gmr067172	0.00100637	down	1.92961	-1.92961	HS6ST2
hsa_gmr012613	0.02171	down	1.93018	-1.93018	CGNL1
hsa_gmr064945	0.00320577	down	1.93054	-1.93054	GNE
hsa_bmr000475	0.0454085	down	1.93087	-1.93087	RHO
hsa_gmi136082	0.0407475	down	1.93119	-1.93119	PITPNM1
hsa_gmr105688	0.032689	down	1.93174	-1.93174	A2ML1
hsa_gmr083488	2.49101e-07	down	1.93448	-1.93448	ACSS2
hsa_gmr091437	0.0487886	down	1.93571	-1.93571	PITPNM1
hsa_gmr080299	0.0432365	down	1.93946	-1.93946	ATP10A
hsa_gmr101074	0.000662149	down	1.94004	-1.94004	MCM7
hsa_gmi129955	0.0194054	down	1.94196	-1.94196	ABCD2
hsa_gmr081722	0.00306972	down	1.94209	-1.94209	FAM222B
hsa_gmr066788	0.000194762	down	1.94221	-1.94221	ACSS2
hsa_gmr102419	0.000659611	down	1.94246	-1.94246	GNE
hsa_gmr117842	0.00112679	down	1.94381	-1.94381	ZNF778
hsa_gmr100109	0.011875	down	1.94478	-1.94478	OPRM1
hsa_bmr047707	0.00214829	down	1.94486	-1.94486	HCAR2
hsa_gmr105694	0.0069239	down	1.94552	-1.94552	RAD9B
hsa_bmr096679	0.0271159	down	1.94733	-1.94733	LPP
hsa_gmr082720	0.0345519	down	1.94832	-1.94832	ZNF71
hsa_gmr113866	0.0177601	down	1.95188	-1.95188	IL9R
hsa_gmr105304	0.00595696	down	1.95215	-1.95215	JHY
hsa_gmi060660	0.0368816	down	1.95443	-1.95443	HKR1
hsa_gmr090420	9.29275e-05	down	1.95514	-1.95514	HMGCR
hsa_bmi055587	0.0301958	down	1.95528	-1.95528	LILRA6
hsa_gmr090233	0.000844744	down	1.9555	-1.9555	UBASH3B
hsa_gmr014479	0.00623962	down	1.9565	-1.9565	STMN3
hsa_gmr082664	0.0405426	down	1.95712	-1.95712	RASIP1
hsa_gmi124908	0.0034231	down	1.95809	-1.95809	MTHFD2L
hsa_gmr042832	0.000257104	down	1.9583	-1.9583	NUAK2
hsa_gmr073609	0.000769558	down	1.95873	-1.95873	HIPK4
hsa_gmr099318	0.00421827	down	1.95901	-1.95901	ELOVL7
hsa_gmr019846	0.0162003	down	1.96206	-1.96206	SERPINB13
hsa_gmr084677	0.00612337	down	1.96286	-1.96286	HS6ST2
hsa_gmr036657	0.0267236	down	1.96362	-1.96362	ITGB1BP2
hsa_gmi129309	0.0414426	down	1.96391	-1.96391	SLC37A2
hsa_gmr001023	0.000127676	down	1.96499	-1.96499	RUNX1
hsa_gmr073800	0.000113288	down	1.96716	-1.96716	ACSS2
hsa_gmi059554	0.0280143	down	1.96941	-1.96941	TAC3
hsa_gmr113316	0.0351818	down	1.96949	-1.96949	ATP1B4
hsa_gmr003646	0.000110068	down	1.97052	-1.97052	ACSS2
hsa_gmr007247	0.00480607	down	1.9709	-1.9709	OPRM1
hsa_gmr077309	0.0156999	down	1.97154	-1.97154	GPR141
hsa_gmr081724	0.0124904	down	1.97312	-1.97312	FAM222B
hsa_bmr079200	0.0484788	down	1.97484	-1.97484	MYO3A
hsa_gmr118599	0.00988912	down	1.97631	-1.97631	PLCH2
hsa_gmr009885	0.0046496	down	1.97722	-1.97722	GNE
hsa_gmr121493	0.0141473	down	1.97787	-1.97787	IQCM
hsa_gmr117045	0.033029	down	1.97843	-1.97843	DCT
hsa_gmi146358	0.0210565	down	1.98043	-1.98043	FREM2
hsa_bmr045432	0.0331333	down	1.98063	-1.98063	LGI4
hsa_gmr012248	0.00352313	down	1.98088	-1.98088	ESRRG
hsa_gmr031644	0.0413688	down	1.98141	-1.98141	HLA-G
hsa_gmi060670	0.0424309	down	1.98156	-1.98156	HKR1
hsa_gmr073090	0.0265381	down	1.9819	-1.9819	ZNF200
hsa_gmr006945	0.0417935	down	1.98273	-1.98273	OGDHL
hsa_gmr083482	7.63179e-05	down	1.9833	-1.9833	ACSS2
hsa_gmr113983	0.0129389	down	1.98399	-1.98399	C5orf60
hsa_gmr103830	0.0105018	down	1.98432	-1.98432	CCDC172
hsa_gmr037143	0.0222877	down	1.98433	-1.98433	MCTS1
hsa_bmr001622	0.0398093	down	1.98637	-1.98637	OR6C75
hsa_gmr070821	0.00150477	down	1.98761	-1.98761	CCR3
hsa_gmr013994	0.00476747	down	1.98837	-1.98837	OTX2
hsa_gmr005515	4.11695e-05	down	1.98909	-1.98909	GNE
hsa_gmr090215	0.00703117	down	1.99215	-1.99215	JHY
hsa_bmr048206	0.0216173	down	1.99516	-1.99516	RXFP4
hsa_gmr041120	0.0397721	down	1.99878	-1.99878	ABHD16A
hsa_gmr011793	2.48706e-05	down	1.99956	-1.99956	ACSS2
hsa_gmr004797	0.000187741	down	2.00066	-2.00066	ELOVL7
hsa_gmr041457	0.016032	down	2.00583	-2.00583	ZBED8
hsa_bmr095051	9.76771e-05	down	2.00616	-2.00616	ANKMY1
hsa_gmr041125	0.035253	down	2.00648	-2.00648	ABHD16A
hsa_gmr083486	3.84681e-05	down	2.00766	-2.00766	ACSS2
hsa_gmr071315	0.000282966	down	2.00961	-2.00961	ELOVL7
hsa_gmr045256	0.0150863	down	2.01156	-2.01156	TM4SF18
hsa_gmr097615	0.0194996	down	2.01193	-2.01193	EVC2
hsa_gmr113778	0.000837204	down	2.01213	-2.01213	HS6ST2
hsa_gmi134567	0.0487795	down	2.01452	-2.01452	KDM5D
hsa_gmr096159	0.0130064	down	2.01644	-2.01644	ZCWPW2
hsa_gmr088968	0.0268854	down	2.01684	-2.01684	ARID5B
hsa_gmr066450	0.0221586	down	2.01757	-2.01757	ZNF583
hsa_bmr001394	0.0353968	down	2.01931	-2.01931	OR4D2
hsa_gmr083487	0.000114277	down	2.02141	-2.02141	ACSS2
hsa_gmi052242	0.0318178	down	2.02169	-2.02169	ABHD16A
hsa_gmr022864	0.0077476	down	2.025	-2.025	DCT
hsa_gmr021398	0.0436306	down	2.02743	-2.02743	CYP1A1
hsa_gmr039765	0.000246067	down	2.02887	-2.02887	FAM222B
hsa_gmr119439	0.0263196	down	2.03034	-2.03034	MGME1
hsa_bmr068181	0.0468172	down	2.03165	-2.03165	PACRG
hsa_gmr083905	0.00022501	down	2.03641	-2.03641	RUNX1
hsa_gmr097974	0.00164044	down	2.03732	-2.03732	MTHFD2L
hsa_gmr001331	0.0246486	down	2.0415	-2.0415	OR1L8
hsa_gmr015575	0.00377016	down	2.04474	-2.04474	OSCAR
hsa_gmr044714	0.0145215	down	2.04672	-2.04672	OSCAR
hsa_gmr005442	0.0249458	down	2.04676	-2.04676	SERPINA1
hsa_bmr104070	0.0339361	down	2.04825	-2.04825	LIPK
hsa_gmr040098	2.83277e-05	down	2.0495	-2.0495	ACSS2
hsa_gmr017516	0.0119018	down	2.05332	-2.05332	SERPINA4
hsa_gmr111500	0.0213938	down	2.05422	-2.05422	POU2F2
hsa_gmi125620	0.0218257	down	2.05499	-2.05499	SKP2
hsa_gmr083485	4.11187e-05	down	2.05604	-2.05604	ACSS2
hsa_gmr074721	0.0400416	down	2.05756	-2.05756	C1orf105
hsa_gmr071303	0.00418889	down	2.05896	-2.05896	SEMA6A
hsa_bmr032936	0.0033908	down	2.0595	-2.0595	FZD9
hsa_bmr108390	0.0488033	down	2.06211	-2.06211	RLBP1
hsa_gmr017253	1.68208e-05	down	2.06379	-2.06379	FAM222B
[truncated: 937 more rows]
